# Supplementary material for: Materials design by evolutionary optimization of functional groups in metal-organic frameworks
Source: PubMed Central journal article supplement — Sci Adv. 2016 Nov 23;2(11):e1600954. doi: 10.1126/sciadv.1600954 (PMC5262444; doi:10.1126/sciadv.1600954), 2016-11-23
Supplement: 1600954_SM.pdf [file 1600954_SM.pdf]

## Supplementary Materials for **Materials design by evolutionary optimization of functional groups in metal-organic frameworks**

Sean P. Collins, Thomas D. Daff, Sarah S. Piotrkowski, Tom K. Woo

Published 23 November 2016, *Sci. Adv.* **2**, e1600954 (2016)

DOI: 10.1126/sciadv.1600954

### **This PDF file includes:**

- Details of the GA
- GA parameters
- Parameter optimization
- MOFF-GA parameter values
- Structure preparation and construction
- Molecular simulations
- Parasitic energy
- Top-performing structures
- fig. S1. Example of the application of a functional group code to the unfunctionalized SBU of the parent MOF.
- fig. S2. Schematic of the one-cut mating process.
- fig. S3. Schematic of the two-cut mating process.
- fig. S4. Schematic of swapping mutation.
- fig. S5. Fitted transformation function (blue dotted line) used in GAPI (genetic algorithm performance indicator) for the best-find rate.
- fig. S6. Fitted transformation function (blue dotted line) used in GAPI for the top 50 performers recovered.
- fig. S7. Fitted transformation function (blue dotted line) used in GAPI for unique MOFs tested for large search space (three or more sites) MOFs.
- fig. S8. Fitted transformation function (blue dotted line) used in GAPI for unique MOFs tested for two-site MOFs.
- fig. S9. Linker symmetry.
- table S1. Scaling functions used for fitness.
- table S2. Description of the MOFF-GA optimization parameters.

- table S3. Values used to fit transformation function (eq. S2) of performance properties.
- table S4. Fitted values used in eq. S2 for each performance properties.  $R^2$  values are calculated using table S3 values.
- table S5. Sterically viable structures for training MOFs.
- table S6. Parameters used by MOFF-GA that were optimized.
- table S7. Terms used in parasitic energy with a brief description.
- table S8. Functionalized MOFs with CO<sub>2</sub> uptake greater than 3 mmol/g with the corresponding functional groups.
- table S9. Details of functional group codes and their associated structure.
- References (33–39)

# Supplementary Materials

## 1. Details of the GA

### Genetic Representation:

Genetic Algorithms (GAs) are built upon the genetic representation, or chromosome, of the system. For MOFF-GA we were interested in optimizing the functional groups on the organic linker, also known as a secondary building unit (SBU). The hydrogen atoms of the SBU are labelled in order to identify each unique functionalization site. Sites which would heavily increase synthetic difficulty if functionalized, such as those on the nitrogen of aniline, were ignored. The functionalized SBU could then be represented by the functional groups attached to each labelled site which we call the Functional Group Code (FGC). The example in fig. S1 shows the labelled sites H1, H2, H3 on the SBU and the FGC F@H1.Cl@H3 which indicates that site H1 is functionalized with a fluoride group and H2 is functionalized with a chloride group. For unfunctionalized sites the label is omitted from the FGC. The combination of parent MOF and FGC uniquely identify each functionalized MOF.

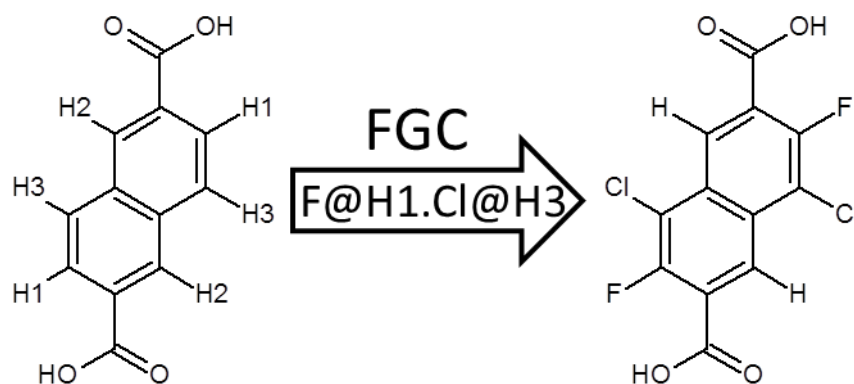

**fig. S1. Example of the application of a functional group code to the unfunctionalized SBU of the parent MOF.**

### ***General Procedure:***

Our GA follows most of the same procedures as other GAs. An initial set of individuals are randomly created, the number of members of the set is known as the *Population*. A set of individuals at a given time is known as a generation. All individuals in the generation are evaluated for their fitness, such as CO<sub>2</sub> uptake. The next generation is constructed from the previous one with mating and mutation mechanisms. Our GA employs elitism which carries forward a fraction of the top performing individuals from one generation into the next generation with no modification. The fraction of top performers carried forward is known as the *Elite*. The top performers are monitored until they converge on a result. Several parameters, (described in Section 2) are used to tune the performance of the whole procedure.

### ***Mating Scheme:***

Most of the individuals in a generation are created by a mating mechanism. Mating is an important part of how a GA works as it ensures the new generation inherits favourable traits of the parents.

### ***Choosing Parents:***

In order to create the new generation with higher performing individuals the top performers from the previous generation need to be selected. We use a single metric,  $x$ , that measures the performance of the material, such as the CO<sub>2</sub> uptake or parasitic energy ( $P_E$ ). We then define a scaling function,  $s(x)$ , which favours the higher performing individuals. The scaling functions will differ based on the optimizing property, as shown in table S1.  $P_E$ , for example, used a scaling function that favoured smaller energies as we want to minimize the property. The CO<sub>2</sub> uptake scaling function is used to place more weight on higher uptake materials. This is done as the range of CO<sub>2</sub> uptake within a generation can be limited. An exponential function will give the higher performing individuals a higher weight during parent selection.

**table S1. Scaling functions used for fitness.**

| Property                 | Scaling Function                   |
|--------------------------|------------------------------------|
| CO <sub>2</sub> Uptake   | $s(CO_2 Uptake) = e^{CO_2 Uptake}$ |
| Gravimetric Surface Area | $s(SA) = SA$                       |
| Parasitic Energy         | $s(P_E) = \frac{1}{P_E}$           |

In eq. 1 the  $i^{\text{th}}$  individual of the population has its scaled performance,  $s(x_i)$ , normalized to the entire population. For the entire population this creates a set which sums to 1 with no individual going below 0. These values are able to be used in a selection process known as fitness proportionate selection, or more commonly, roulette wheel. The roulette wheel technique allows any member of the generation to be selected at random based on its weight. The higher the weight the more likely it will be chosen

$$\mathbf{Weight}(x_i) = \frac{s(x_i)}{\sum_{n=1}^{popn} s(x_i)} \quad (1)$$

The roulette wheel works by randomly selecting a random number between 0 and 1. The weight of each individual are then added, in descending order, until the cumulative weight is greater than the random number. The individual that caused the cumulative weight to go beyond the random number is selected as a parent. This process is repeated for a second parent. If both parents are the same individual both parents are reselected. This allows the new generation to come up with new, untested individuals to test. Once both parents are chosen they are mated by either a 1 or 2-cut mating scheme. There is a random choice for selecting between the 1 and 2-cut schemes which is known *Single Cut Rate*. The larger the *Single Cut Rate* the more likely the 1-cut mating scheme will occur.

***1-cut mating scheme:***

In the 1-cut mating scheme, the chromosomes of both parents are cut at a single, randomly selected position and complementary pieces from the two parents are combined. This process is shown in fig. S2. The selection of the first and second portion is also randomly selected with an equal chance.

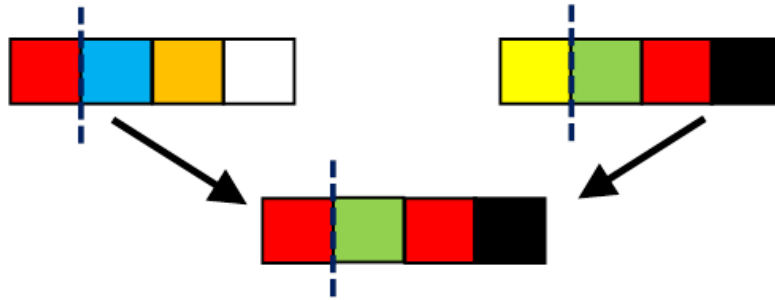

**fig. S2. Schematic of the one-cut mating process.**

***2-cut mating scheme:***

The 2 cut mating procedure is similar to that of the 1-cut mating scheme however two unique locations are chosen. The two locations are chosen at random and must not be the same. There is an equal chance for each parent to provide the middle slice or the outer slices. These sections are then joined together to form the new child, as seen in fig. S3.

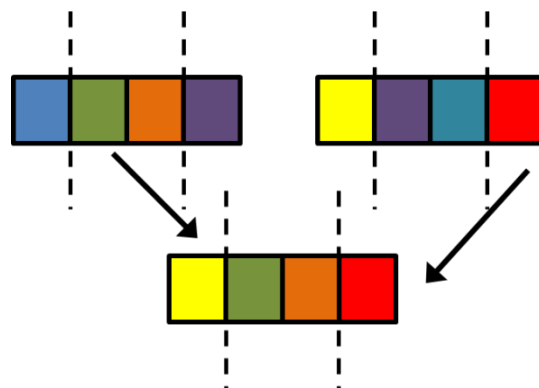

**fig. S3. Schematic of the two-cut mating process.**

### ***Mutations:***

After mating occurs, the new child undergoes mutation. MOFF-GA used two distinct mutations, Type 1 and Type 2 Mutations (described below). The number of mutations a single child can have is equal to the number of functional positions plus 1. Type 1 Mutation can occur once during the mutation process. Type 2 Mutation can occur at every functional position during the mutation process. The rate that mutations occur is known as the *Mutation Rate*. This single value controls how often all mutations occur in MOFF-GA. We have also included a biasing scheme that prefers selection of functional groups that appear more often in high performing members (Described later).

### ***Type 1 Mutation:***

The first mutation is known as a swapping mutation. This mutation will swap the functional groups of two randomly chosen functionalization sites. If the two functional groups are identical, then the mutation completes even though there is no effective change in the chromosome. The mutation is schematically shown in fig. S4.

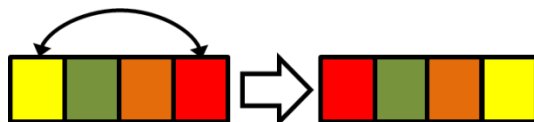

**fig. S4. Schematic of swapping mutation.**

### ***Type 2 Mutation:***

The second mutation is a replacement mutation which changes the functional group at a single functional position. The mutation can occur at every functional group in the chromosome, with a probability given by the *Mutation Rate*, potentially creating a fully random chromosome from the parents. If a functional group position is selected for mutation by the *Mutation Rate* a subsequent choice is made of whether to replace it with a chemically similar or dissimilar

functional group. The choice of similar or dissimilar is chosen randomly according to the *Similarity Probability* parameter. The higher the *Similarity Probability* is, the more likely a chemically similar functional group will be chosen.

Chemical similarity was determined by 3 properties, the Electrostatic Potential (ESP), the van der Waals Potential (VdWP), and steric hindrance. For all functional groups, the groups were aligned as if attached to a benzene ring, and all of the properties were calculated on identical 3D grids which were larger than the largest functional groups. ESPs were calculated using charge equilibration (QEq) atomic charges on the functional group with a point charge probe. The VdWPs were calculated using a Lennard-Jones 6-12 potential with universal force field (UFF) parameters (18) and a carbon probe. Steric hindrance was decided with a binary output using the VdWP. If the VdWP at a grid point was 0 or greater it was set as sterically unavailable and assigned a value of 1. If the VdWP was below 0 it was sterically available and assigned a value of 0.

To calculate the similarity between two functional groups we used a continuous Tanimoto coefficient. The Tanimoto coefficient is a pairwise similarity measure shown in eq. 2. In Tanimoto calculations, two functional groups (A and B) have paired components,  $i$ , compared to calculate the overall similarity. For our chemical similarity the components used were the value of each property at each grid point. The similarity is a normalized value that ranges 0 (maximum dissimilarity) to 1 (the same)

$$\mathbf{Tanimoto}(A, B) = \frac{\sum_i A_i B_i}{\sum_i A_i A_i + \sum_i B_i B_i - \sum_i A_i B_i} \quad (2)$$

Using the Tanimoto coefficients two unique sets are created for every functional group, the chemically similar and dissimilar sets. These are created by assigning a *Similarity Threshold Value*. This single value is used to discriminate between chemically similar and dissimilar functional groups for each combination. If the Tanimoto coefficient for two functional groups is less than the *Similarity Threshold Value* they are classified as dissimilar while if they higher they are similar.



### ***Biased Functional Group Selection:***

When MOFF-GA is initialized all chemically similar (or chemically dissimilar) functional groups have an equal probability of being selected during Type 2 Mutation. The Biased Functional Group (BFG) function makes functional groups that appear more often in high performing members have a greater chance of being selected during Type 2 Mutation. Similarly it will make functional groups which continually appear in low performing individuals and have a lower chance of selection. This process is controlled by 3 unique parameters known as the *Weighting Cut*, the *Weighting Cut-Off* and the *Weighting Change*. The *Weighting Cut* is the fraction of top (bottom) individuals that are considered as the top (bottom) performers in the function. The *Weighting Cut-Off* will determine how often a single functional group needs to appear in the top (bottom) performers for its weighting to be changed. Finally the *Weighting Change* will determine how much to add (subtract) from the weighting of the functional group. The initial weighting for every functional group is set to 50 and is limited to never drop below 1. During selection of functional groups the weighting of a functional group describes the probability of it being selected. For example if two functional groups, A and B, have weightings of 50 and 1 respectively then functional group A will be selected 50 times more often than functional group B.

### ***Stagnation:***

Once the top performing individual has remained constant for a set number of generations, determined by *Stagnation*, MOFF-GA enters a stagnation phase. During the stagnation phase MOFF-GA uses 3 methods to create new individuals: mutating the best; random creation; and normal mating. When mutating the best, individuals are created which differ from the best performer by one functional group. All combinations of these individuals are created randomly over stagnant generations and tested for their performance. A fraction of the population each generation, determined by the *Best Mutated* parameter, is reserved for these individuals. Random creation, during the stagnation adds completely randomly made individuals each generation of the stagnation phase. The amount of randomly created individuals each generation is set by the *Random Mutated* parameter. The remaining population are created using the normal mating scheme.

### ***Convergence:***

The endpoint of MOFF-GA is based on convergence criteria since the GA cannot know when and if it has found the best individual. Once the criteria are met, the GA will finish. For MOFF-GA there are two convergence criteria. The first is the top performing individual must stay the same for a set amount of generations known as the *Convergence*. The second is that all individuals which differ by only one functional group from the top performer must have been tested. Once these two criteria have been met MOFF-GA is considered complete.

### ***2. GA parameters***

The GA has 13 unique parameters which can be modified. All parameters are mentioned in the GA detail (Section 1). Table S2 lists all parameters and their effects on MOFF-GA.

**table S2. Description of the MOFF-GA optimization parameters.**

| <b>Property</b>            | <b>Description</b>                                                                                                                   |
|----------------------------|--------------------------------------------------------------------------------------------------------------------------------------|
| Population                 | Number of individuals within a single generation                                                                                     |
| Elite                      | Fraction of best performing individuals carried over to next generation                                                              |
| Single Cut Rate            | Probability of performing a 1-cut vs 2-cut mating during mating process                                                              |
| Mutation Rate              | Probability of a Type 1 Mutation or Type 2 Mutation at each functional position occurring                                            |
| Similarity Threshold Value | Similarity threshold value for determining chemically similar and chemically dissimilar functional groups                            |
| Similarity Probability     | Probability of mating with a chemically similar functional group vs chemically dissimilar functional group                           |
| Weighting Cut              | Fraction of top and bottom individuals used during weighting change                                                                  |
| Weighting Cut-off          | Number of ties a single functional group needs to be in the Weighting Cut fraction for a Weighting Change to occur                   |
| Weighting Change           | Value of weight change for a functional group if ‘Weighting Cut-Off’ is achieved (Initial for all functional groups is weight of 50) |
| Stagnation                 | Number of generations of the same top performer before stagnation phase begins                                                       |
| Best Mutated               | Fraction of individuals during stagnation that are similar to the top performer                                                      |
| Random Mutated             | Fraction of individuals during stagnation that are randomly created (Not from mating)                                                |
| Convergence                | Minimum number of generations of the same top performer before convergence is achieved                                               |

### ***3. Parameter optimization***

#### ***Genetic Algorithm Performance Index (GAPI):***

There are many ways to rank the performance of a GA, such as how often it finds the top performer, or how many individuals are tested. We developed a term known as the genetic algorithm performance index (GAPI) to rank the performance of MOFF-GA by a single number. GAPI (eq. 3) combines three unique MOFF-GA performance properties: 1) how often the top performer is found (Best Find Rate), 2) the number of the top 50 performing individuals found, and 3) how many unique individuals are tested. These were selected with the idea of wanting MOFF-GA to find the top performer, many good performers, and to do so with testing as few

unique individuals as possible (reduce the computations). These are built on having a high best find rate, a high amount of the top 50 MOFs found, as well as few individuals tested as possible

$$GAPI = S_{BFR} + S_{Top\ 50} + S_{Unique} \quad (3)$$

$S_{BFR}$ ,  $S_{Top\ 50}$  and  $S_{Unique}$  are transformation functions which convert the best find rate, amount of top 50 found and amount of unique MOFs tested respectively. As we felt no single performance property was more important we constrained each function to lie between 0 and 1. This allowed every performance property an equal opportunity to contribute to the overall GAPI. We decided not to use simple weighting or scaling functions as each performance property was seen as non-linear. For example if we consider two unique cases of MOFF-GA, one where 0 of the top 50 performers are recovered and one where 35 are recovered. Increasing from 0 to 10 of the top 50 performers should have a larger effect on GAPI than increasing from 35 to 45. This is reasonable as it is more important to improve the first amount of performance parameters rather than to fully maximise a property. By applying a more complex transformation function, such as the sigmoidal function shown in eq. 4, we could both scale the properties appropriately and capture the non-linear effects

$$S_i(x) = \frac{K}{1+A*e^{-r*x}} + C \quad (4)$$

Sigmoidal functions can be easily fit to scaled, non-linear data due to high flexibility of parameters. First we needed to define scale the values of  $x$ . Using the absolute value for BFR or amount of unique used would cause the bottom term to nearly disappear. We scaled all performance properties to lie between 0 and 1. For best find rate and top 50 recovered this was done by normalizing values to the maximum (100 and 50 respectively). The scaling for the amount unique MOFs tested was found by first subtracting the amount of chemically similar (differing from the top performer by one functional group) and then taking the inverse (eq. 5). The amount of chemically similar MOFs is removed because these need to be tested by the convergence criteria. This would make the amount of unique MOFs less the chemically similar ones the absolute minimum that could be tested

$$Scaling\ Unique\ MOFs = \frac{1}{Unique\ MOFs - Chemically\ Similar} \quad (5)$$

By setting eq. S4, to 0 and 1 at the lowest and highest possible values for  $x$  respectively, we could rearrange for  $K$  and  $C$  in terms of  $A$  and  $r$ . This constrained the function to go between 0 and 1 over the range for all possible values of  $x$  regardless of the values of  $A$  and  $r$ . Each transformation function could then be fit by using only  $A$  and  $r$  and would still remain within the 0 to 1 range.

The final thing necessary before the fitting could actually occur was to define the remaining data points. These were objectively selected values chosen from *a priori* knowledge of how MOFF-GA worked. The values, seen in table S3, were selected based on a scale of performance. Low Function Value (0.2) would be known as a ‘very bad’ performance, while a high Function Value, such as 0.9, would be a ‘very good’ performance. The Function Values of 0 and 1 correspond to the worst and best performances respectively.

**table S3. Values used to fit transformation function (eq. S2) of performance properties.**

| Function Value | BFR (%) | Top 50 Recovered | Unique MOFs | Unique MOFs (2-sites) |
|----------------|---------|------------------|-------------|-----------------------|
| 0              | 0       | 0                | Infinite    | 730                   |
| 0.2            | 10      | 3                | 3000        | 350                   |
| 0.4            | 30      | 8                | 2200        | 250                   |
| 0.6            | 50      | 14               | 1600        | 180                   |
| 0.8            | 80      | 24               | 1100        | 90                    |
| 0.9            | 95      | 37               | 500         | 30                    |
| 1              | 100     | 50               | 1           | 1                     |

Using the sigmoidal function we respected both range from 0 to 1 of the Function Values as well as the non-linearity of the MOFF-GA’s performance. By having the constrained range all GAPI’s would lie between 0 (worst) and 3 (best). This allowed a quick understanding of how MOFF-GA performed during those trials. The non-linearity of the sigmoidal functions allowed each property to be treated uniquely as previously mentioned. This is most evidently seen during parameter optimization if one performance property reached a ‘very good’ (0.9) performance while the others were at ‘bad’ (0.4) levels. It would be more beneficial, and potentially easier, to

improve the two ‘bad’ properties than to try maximise the one already at ‘very good’.

Table S3 shows two sets of Unique MOFs values, one for 2-site MOFs and one for larger site (3+ site) MOFs. The amount needed for 2-site MOFs is significantly smaller than the large search space MOFs. This is best seen that for a large site MOF a ‘very good’ performance was set to 500 unique MOFs tested. For a 2 site MOF 500 individuals would be almost all possible MOFs (784) and would make MOFF-GA unnecessary. This did not allow a good range for the amount of unique MOFs used, and therefore a second transformation function for the amount of unique MOFs tested is used when 2-site MOFs are considered.

All equations were fit using the SciPy package in python. As mentioned only the values of  $A$  and  $r$  were fitted. Table S4 shows values used for each transformation function.  $R^2$  is also shown for each transformation function. The 2-site Unique MOFs transformation function had the smallest  $R^2$  at 0.942. Figures S5 to S8 show the transformation functions for each performance property with the values they were fitted against.

table S4. Fitted values used in eq. S2 for each performance properties.  $R^2$  values are calculated using table S3 values.

| Property             | X                                                   | A      | r        | K       | C       | $R^2$ |
|----------------------|-----------------------------------------------------|--------|----------|---------|---------|-------|
| BFR (%)              | BFR (%) / 100                                       | -0.992 | 0.00376  | -0.0226 | 3.015   | 0.986 |
| Top 50 Recovered     | Top 50 Recovered / 50                               | -1.732 | -1.340   | 0.841   | 1.150   | 0.999 |
| Unique MOFs          | $1 / (\text{Unique} - \text{Chemically Similar}^a)$ | 8.352  | 4174.663 | 1.120   | -0.120  | 0.984 |
| Unique MOFs (2-Site) | $1 / (\text{Unique} - \text{Chemically Similar}^a)$ | 3.239  | 308.689  | 1.471   | -0.4712 | 0.942 |

<sup>a</sup>Chemically Similar refers to the number of MOFs which differ from the top performer by 1 functional group.

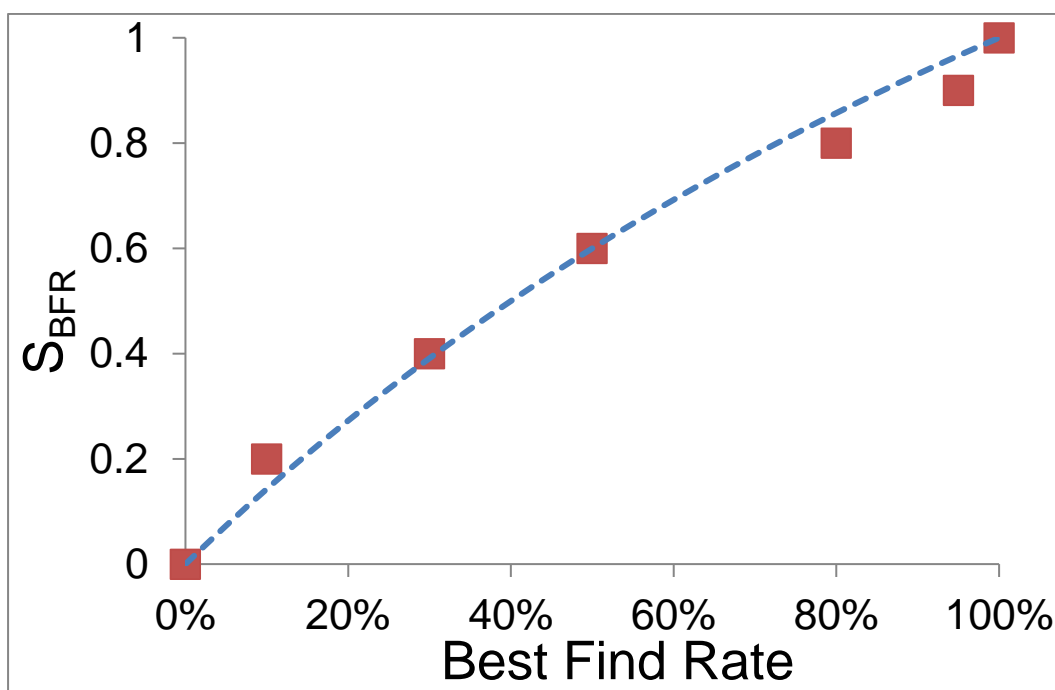

fig. S5. Fitted transformation function (blue dotted line) used in GAPI (genetic algorithm performance indicator) for the best-find rate.

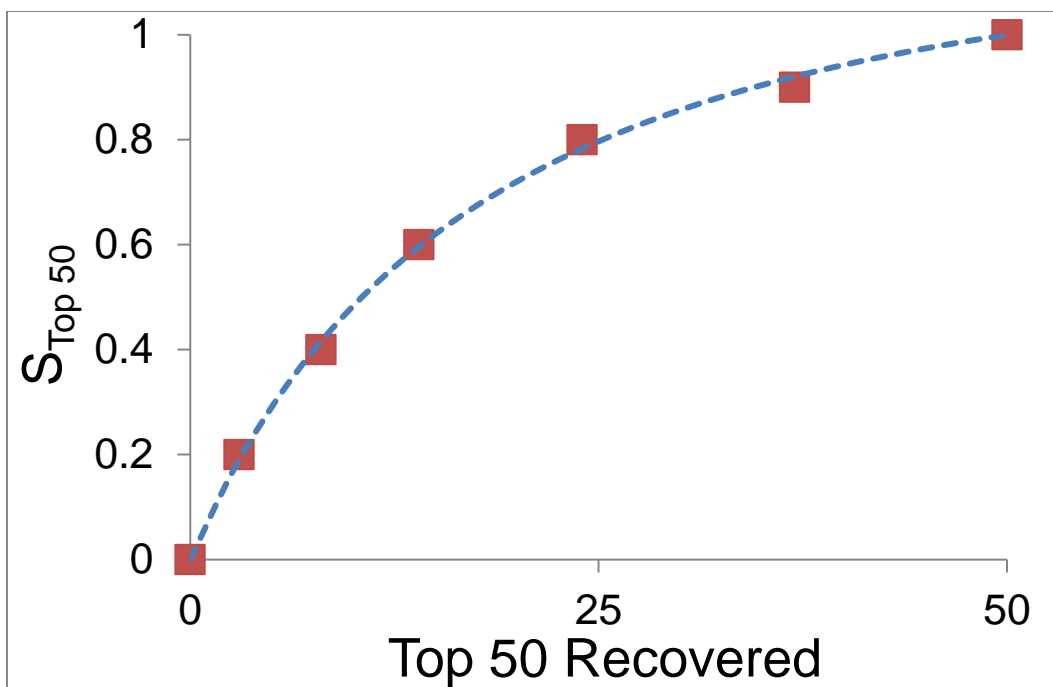

**fig. S6. Fitted transformation function (blue dotted line) used in GAPI for the top 50 performers recovered.**

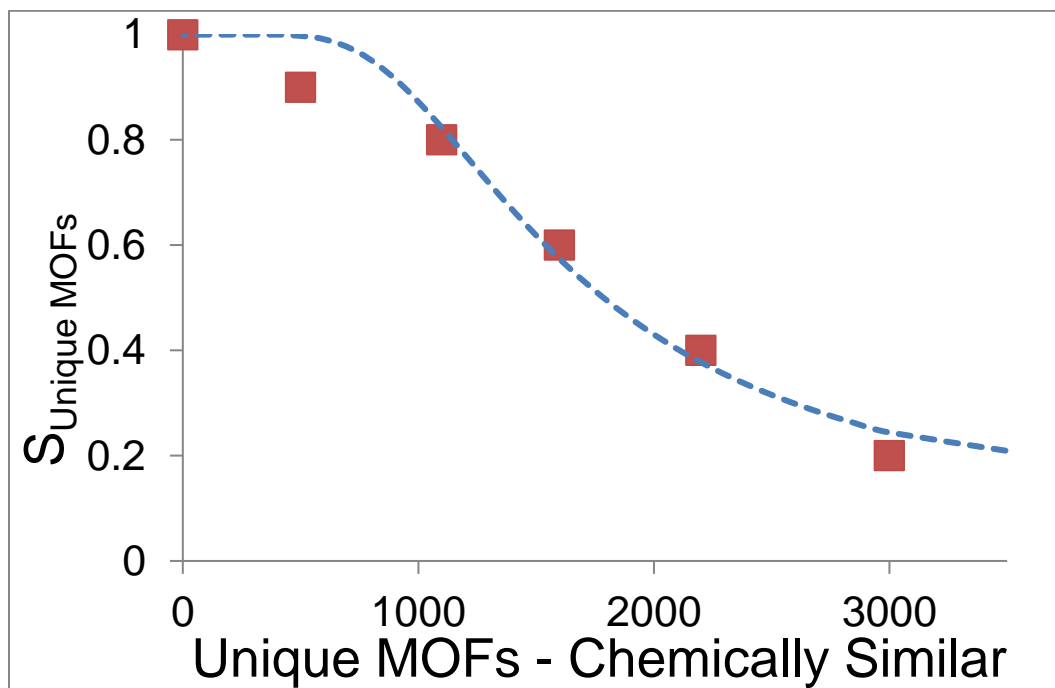

**fig. S7. Fitted transformation function (blue dotted line) used in GAPI for unique MOFs tested for large search space (three or more sites) MOFs.**



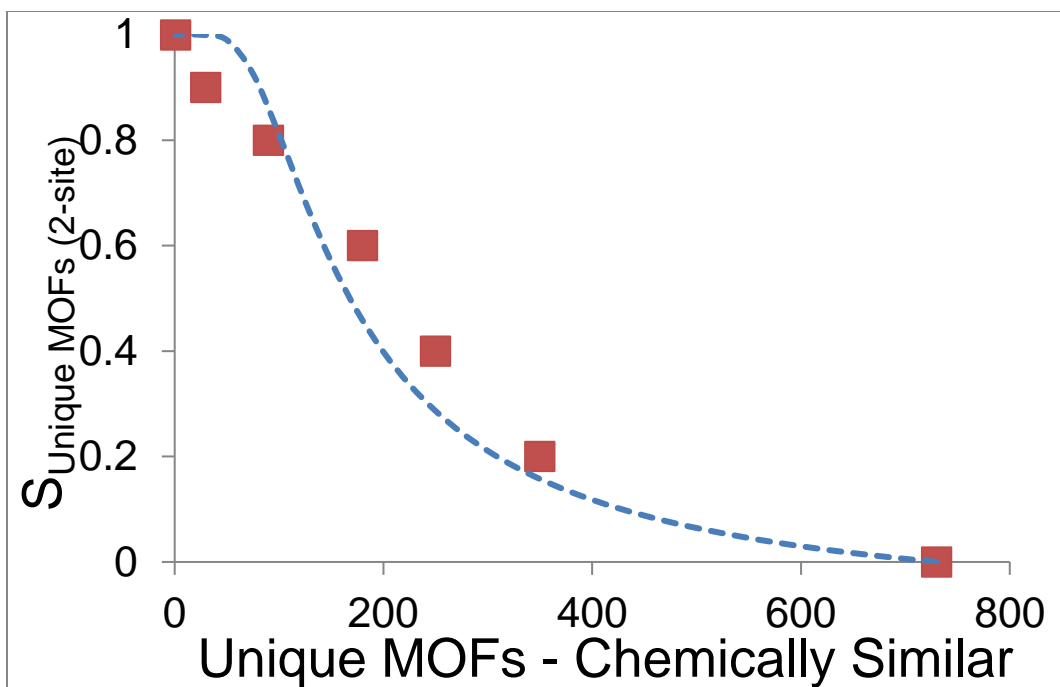

**fig. S8. Fitted transformation function (blue dotted line) used in GAPI for unique MOFs tested for two-site MOFs.**

### ***Optimization Sets:***

To find the 13 optimal MOFF-GA parameters (Section 2), a test set of 7 different MOFs was used: OCIHIS (33), bio-MOF-11 (34), IRMOF-6 (35), MITSEO (36), IRMOF-16 (35), UTEXAT (37) and  $Zn_2(1\text{-}4\text{-benzenedicarboxylate})_2(\text{pyrazine})$ , ZBP. For each of these MOFs, the complete search space was evaluated for the three properties:  $CO_2$  uptake at 0.15 atm and 298 K, gravimetric surface area, and the parasitic energy,  $P_E$  (see Section 7). Table S5, details the size of the search space for each of the seven MOFs used to optimize the GA parameters. In this work, three sets of MOFF-GA parameters were developed, one for large search spaces (4+-site parameters), one for small search spaces (3-site parameters) and one for very small search spaces, which we call the 2-site GA parameters. To find the optimal parameters for large search spaces, the MOFs ZBP and UTEXAT, which have 4 or more functionalization sites, were used. To find a general and robust set of MOFF-GA parameters, the aggregate GAPI was optimized for all 3 properties, for these 2 MOFs simultaneously. For small search spaces, the same was performed with the 2 MOFs: MITSEO, IRMOF-16. The GA parameters were also optimized for very small search spaces with the 3 MOFs: OCIHIS, Bio-MOF-11 and IRMOF-6.

**table S5. Sterically viable structures for training MOFs.**

| Functional Positions | Total Possible Structures | MOF        | Viable Structures |
|----------------------|---------------------------|------------|-------------------|
| 2                    | 784                       | OCIHIS     | 621               |
|                      |                           | Bio-MOF-11 | 629               |
|                      |                           | IRMOF-6    | 644               |
| 3                    | 21,952                    | MITSEO     | 14,293            |
|                      |                           | IRMOF-16   | 17,514            |
| 4                    | 614,656                   | ZBP        | 96,156            |
| 5                    | > 17 million              | UTEXAT     | 36,501            |

***MOFF-GA Parameter Optimization:***

A variety of methods could have been used to optimize the 13 GA parameters; however, we opted to use a GA. As not to confuse it with the MOFF-GA, we will term the GA used to optimize the MOFF-GA parameters, pGA. The structure of pGA is similar to MOFF-GA, where the 13 parameters and their values are used to make up the pGA chromosome (parameter set). Each generation of pGA consisted of 25 unique parameter sets. The convergence criteria of pGA was set to the top performing parameter set remaining constant for 10 generations. To optimize the parameters, the fitness function used was the sum of the GAPIs for all MOFs in each set (4+-site, 3-site and 2-site), for all three properties (CO<sub>2</sub> uptake, surface area, and P<sub>E</sub>). To evaluate the GAPI MOFF-GA was ran 100 times for each MOF, for each property. From those trials the best find rate, the average of the top 50, and number of unique individuals sampled were determined. To ensure high performing parameter sets pGA was run a total of 5 times on each MOF set.

***Parameter Set Performance:***

Each set of GA parameters were optimized on a subset of the MOFs with complete search

spaces. A subset was selected for parameter optimization due to the computational expenses. There were a total of 50 MOFs (25 2-site, 20 3-site and 5 4+-site) which had a complete area scan completed for the 3 properties. As we only optimized the parameters on the subset of all available MOFs, we tested each of top 5 parameter sets from the parameter optimization.

The total of 10 parameter sets found from small and large search space optimization were tested on both small and large search spaces. It was thought for small and large space MOFs there could be a single robust parameter set that would perform well on all of them. This was thought because values between the small and large space parameter sets were relatively close and could potentially be transferable. The values for the very small search spaces were significantly different than the other parameter sets and were treated differently. We then tested the 5 parameter sets determined from very small search space optimization only on the very small search space MOFs. The parameter sets were tested by performing 100 runs of MOFF-GA, for each property, for each MOF. For each property the 100 trials were used to calculate a GAPI. The sum of all GAPIs was used as the determining factor for performance.

It was found the 2<sup>nd</sup> best parameter set from the large search space optimization worked best on all MOFs with 3 or more sites, for all properties. We chose this parameter set as default parameters for MOFF-GA. For MOFs with 2-sites it was found the best parameter set from the optimization was the top performing parameter set on very small search spaces. This parameter set was then referred to as 2-site parameters. The exact values for each parameter set and their ranges during optimization are shown in table S6.

#### 4. MOFF-GA parameter values

table S6. Parameters used by MOFF-GA that were optimized.

| Property                   | Min.           | Max.                       | Default (3+ Sites)<br>Parameters | 2-Site<br>Parameters |
|----------------------------|----------------|----------------------------|----------------------------------|----------------------|
| Population                 | 10             | 400                        | 113                              | 27                   |
| Elite                      | 0              | 0.5                        | 0.272                            | 0.478                |
| Single Cut Rate            | 0              | 1                          | 0.958                            | 0.415                |
| Mutation Rate              | 0              | 1                          | 0.446                            | 0.298                |
| Similarity Threshold Value | 0              | 0.9                        | 0.312                            | 0.538                |
| Similarity Probability     | 0              | 1                          | 0.305                            | 0.417                |
| Weighting Cut              | 0              | 0.5                        | 0.419                            | 0.201                |
| Weighting Cut-off          | 0              | 20                         | 2                                | 1                    |
| Weighting Change           | 0              | 50                         | 24                               | 18                   |
| Stagnation                 | 0              | 5                          | 3                                | 1                    |
| Best Mutated               | 0              | 1 – Elite                  | 0.038                            | 0.256                |
| Random Mutated             | 0              | 1 – (Elite + Best Mutated) | 0.064                            | 0.036                |
| Convergence                | Stagnation + 1 | Stagnation + 5             | 5                                | 2                    |

#### 5. Structure preparation and construction

MOFs were found from the Cambridge Structural Database (CSD). MOFs were cleaned in Materials Studio. Cleaning involved removing guest/solvent molecules, removing disorder from the framework and assigning symmetry. Symmetry was assigned by Materials Studio and used as a basis for the number of functional sites on the SBUs.

For some MOFs the symmetry of the SBUs was greater than the MOF's overall symmetry. An example of this idea is seen in fig. S6. In this example the SBU on the left would be the symmetry determined by Materials Studio. By modifying the names of the hydrogen atoms within the CIF an artificial symmetry was imposed on the SBU. This does not change the symmetry within the CIF but does affect how the MOF is functionalized. If two hydrogen atoms have the same name they were seen as symmetrical by our functionalization program.

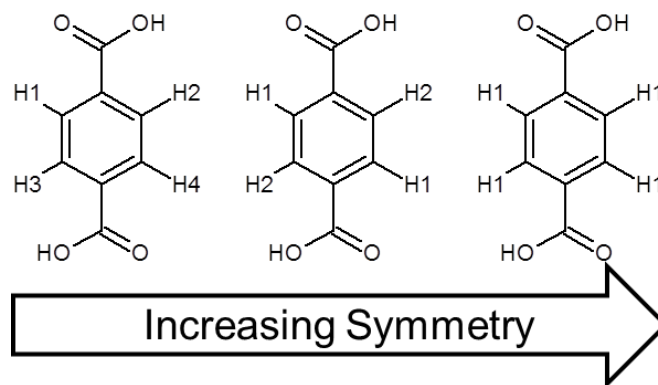

**fig. S9. Linker symmetry.**

All functionalized SBUs found at the higher symmetry can be found at the lower symmetry. These artificial symmetries were placed on the SBUs to increase synthetic feasibility. At the lower symmetry SBUs, if all synthetic positions contain different functional groups it could be difficult to synthesis both the SBU and the MOF. Additionally the higher symmetry limits the search space as the size is defined by the number of symmetrical positions raised to the number of functional groups available. Although the low symmetry SBU could reach the same functionalizations as the highly symmetrized SBU it is not always guaranteed. For these reasons we have included the same MOFs at different levels of SBU symmetry.

Functionalization of MOFs was carried out using an in-house program, *Fapswitch*. *Fapswitch* works by first identifying symmetrical atoms in the MOF. Using the FGC (fig. S1) functional groups are placed sequentially into the MOF. *Fapswitch* ensures that there are no steric collisions from the inserted functional groups by doing a simple conformational search. Combinations of functional groups are rejected if atoms fall within a factor of the atom's Van der Waals radius. A factor of  $2^{(1/6)}$  of the VdW radius was used as this ensures that the VdW potential of any inserted atom is 0 or lower in a Lennard-Jones 12-6 potential. For each site, the functional group is inserted, aligned with the structure using the minimum energy configuration when attached to a benzene ring. All inserted atoms are tested for overlap. If there is steric overlap the group is rotated about the bond to the structure incrementally until there is no overlap. If a complete rotation is completed without finding a configuration with no overlap, that FGC is rejected. The procedure is repeated for all sites in the MOF and all codes in the FGC.

To relax the induced stresses, all MOFs had their geometries optimized with UFF as

implemented in the General Utility Lattice Program (GULP), version 4.0 (38). Bonding information was included in the generation of the structures and passed to the optimizer.

## **6. Molecular simulations**

Gas adsorption calculations were performed using an in-house Grand Canonical Monte Carlo (GCMC) code based on DL\_POLY 2 molecular dynamics package (28). Non-bonding interactions were calculated with a Lennard-Jones potential utilizing parameters for the framework atoms taken directly from the UFF (18) with Lorentz-Berthelot mixing rules for cross-terms. Electrostatics were based on partial atomic charges calculated by charge equilibration using the MEPO-QEq parameters (19), which were fit to reproduce the electrostatic potential obtained from REPEAT atomic partial charges (29). The CO<sub>2</sub> molecules were modeled using the force field developed by García-Sánchez et al. (30) and the N<sub>2</sub> molecules were modelled using the TraPPE force field parameters (31).

All GCMC simulations consisted of 30000 cycles of equilibration and 30000 cycles of production. One cycle consists of a N of trial moves where N is equal to the number of guest molecules in the system at that time. All simulations included random insertion, deletion, and translation moves of molecules with equal probabilities. Atoms in the framework were held fixed at their crystallographic positions. A LJ cut-off distance of 12.5 Å was used for all simulations and a supercell is constructed for each structure that satisfies the minimum image criterion. The Ideal gas law was assumed when computing the chemical potential in the grand canonical ensemble.

Geometric properties were calculated with Zeo++ (32) using helium probe of 1 Å to determine the solvent accessible surface areas and pore sizes.

## **7. Parasitic energy**

The parasitic energy ( $P_E$ ) is a term to describe the energy needed to remove CO<sub>2</sub> from a solid sorbent.  $P_E$  is a combinatorial term which has information from adsorption conditions and desorption conditions. For adsorption conditions we used flue gas conditions (298 K with 0.15

bar CO<sub>2</sub> and 0.75 bar N<sub>2</sub>), while desorption condition were at increased temperature and decreased pressure (413 K with 0.70 bar CO<sub>2</sub> and 0.01 bar N<sub>2</sub>).

P<sub>E</sub> is broken into two terms, the thermal contribution (Q) and the work of compression (W<sub>Comp</sub>). Q (eq. 5) contains the energy necessary to raise the temperature of the system and disrupt the host-guest interactions. It is seen that Q contains the heat capacity of the adsorbent being used. Determining the heat capacity of a material can be a computational expensive calculation to run. In this study we used a constant heat capacity for all materials of 1 kJ/kgK. This was chosen as it was average value over a range of similar solid sorbents from a previous study (39). W<sub>Comp</sub> (eq. 6) is the energy necessary to change the pressure during desorption process as well as to compress it for transport conditions (313 K and a total of 150 bar)

$$Q = \frac{\Delta T (C_p + \sum_i^{gas} C_i q_i^a)}{\Delta q_{CO_2}} + \frac{\sum_i^{gas} \Delta h_i^a q_i^a - \Delta h_i^d q_i^d}{\Delta q_{CO_2}} \quad (5)$$

$$W_{Comp} = R \left\{ T_{comp} \left| \ln \left( \frac{p_c}{p_d} \right) \right| + T_{de} \left| \ln \left( \frac{p_d}{p_a} \right) \right| \right\} \sum_{i=1}^{gas} \frac{\Delta q_i}{\Delta q_{CO_2}} \quad (6)$$

P<sub>E</sub> (eq. 7) adds the thermal contribution and work of compression, while taking into account energy recovery from the desorption process. The terms that make up Q, W<sub>Comp</sub>, and P<sub>E</sub> are described in table S7

$$P_E = 0.75 \eta_{T_{final}} Q + W_{comp} \quad (7)$$

**table S7. Terms used in parasitic energy with a brief description.**

| Term                | Description                                                        |
|---------------------|--------------------------------------------------------------------|
| $\Delta T$          | Change in temperature from adsorption to desorption conditions     |
| $C_P$               | Heat capacity of adsorbent (1 kJ/kgK)                              |
| $C_i$               | Heat capacity of the gas $i$                                       |
| $q_i^{a(d)}$        | Amount of gas $i$ adsorbed at adsorption (desorption) condition    |
| $\Delta h_i^{a(d)}$ | Heat of adsorption of gas $i$ as adsorption (desorption) condition |
| $\Delta q_i$        | Working capacity of a gas $i$                                      |
| $T_{C(d)}$          | Temperature at compression (desorption) condition                  |
| $P_{c(d)(a)}$       | Pressure at compression (desorption) (adsorption) condition        |
| $\eta_{TFinal}$     | Carnot efficiency of steam generator (0.18)                        |

### ***8. Top performing structures***

Provided in table S8 are a list of all MOFs found CO<sub>2</sub> uptake greater than 3 mmol/g at flue gas conditions. Parent MOFs are the unfunctionalized base structure with their SBUs given. For each high performing functionalization the CO<sub>2</sub> uptake and the FGC are given. Figure S1 shows how the FGC works by changing the parent MOF's SBUs into the functionalized SBUs. For simplicity if a functional position is a hydrogen atom than it is not omitted in the FGC. The details of the functional groups, such as name and structure, are given in table S9.



**table S8. Functionalized MOFs with CO<sub>2</sub> uptake greater than 3 mmol/g with the corresponding functional groups. A blank Functional Group Code means the unfunctionalized Parent MOF.**

| Parent MOF | Secondary Building Unit                                                            | Functional Group Code                    | CO <sub>2</sub> Uptake (g/mmol) |
|------------|------------------------------------------------------------------------------------|------------------------------------------|---------------------------------|
| AFOYOK     | 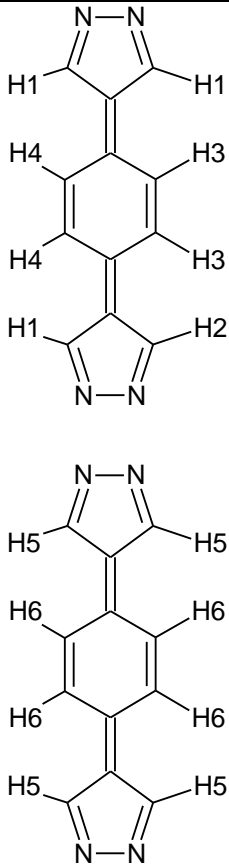 | Me@H6                                    | 4.090                           |
|            |                                                                                    | Me@H4.Cl@H6                              | 3.790                           |
|            |                                                                                    | HCO@H4                                   | 3.783                           |
|            |                                                                                    | HCO@H4.F@H6                              | 3.744                           |
|            |                                                                                    | HCO@H4.OH@H6                             | 3.619                           |
|            |                                                                                    | F@H1.OH@H3.Me@H6                         | 3.595                           |
|            |                                                                                    | Me@H4.CN@H6                              | 3.593                           |
|            |                                                                                    | HCO@H4.OH@H5                             | 3.582                           |
|            |                                                                                    | HCO@H6                                   | 3.542                           |
|            |                                                                                    | Me@H4                                    | 3.496                           |
|            |                                                                                    | OH@H6                                    | 3.467                           |
|            |                                                                                    | Cl@H6                                    | 3.427                           |
|            |                                                                                    | CHNH@H1.HCO@H2.Me@H5.NO <sub>2</sub> @H6 | 3.410                           |
|            |                                                                                    | Me@H4.OH@H5                              | 3.395                           |
|            |                                                                                    | NH <sub>2</sub> @H1.HCO@H6               | 3.237                           |
|            |                                                                                    | CN@H6                                    | 3.233                           |
|            |                                                                                    | Me@H3.OH@H6                              | 3.222                           |
|            |                                                                                    | OH@H3.Cl@H6                              | 3.185                           |
|            |                                                                                    | Et@H6                                    | 3.181                           |
|            |                                                                                    |                                          | 3.163                           |
|            |                                                                                    | F@H2.Me@H4                               | 3.160                           |
|            |                                                                                    | F@H1.OH@H3                               | 3.153                           |
|            |                                                                                    | F@H6                                     | 3.136                           |
|            |                                                                                    | HCO@H4.NH <sub>2</sub> @H5               | 3.135                           |
|            |                                                                                    | OH@H1.OH@H2.HCO@H6                       | 3.127                           |
|            |                                                                                    | OH@H1.HCO@H6                             | 3.090                           |
|            |                                                                                    | Cl@H4                                    | 3.060                           |
|            |                                                                                    | NH <sub>2</sub> @H4.HCO@H6               | 3.043                           |

|          |                                                                                                                                                                            |                            |       |
|----------|----------------------------------------------------------------------------------------------------------------------------------------------------------------------------|----------------------------|-------|
| AJORAT   | 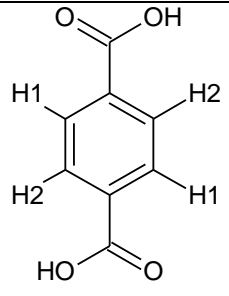<br>     | MeNH2@H1.OH@H2.HCO@H5      | 4.104 |
|          |                                                                                                                                                                            | OMe@H1.OH@H2.HCO@H5        | 3.695 |
|          |                                                                                                                                                                            | MeNH2@H1.F@H2.HCO@H5       | 3.543 |
|          |                                                                                                                                                                            | Et@H1.OH@H2.HCO@H5         | 3.376 |
|          |                                                                                                                                                                            | SO3H@H1.OH@H2.HCO@H5       | 3.364 |
|          |                                                                                                                                                                            | Me@H1.HCO@H5               | 3.356 |
|          |                                                                                                                                                                            | COOH@H3.HCO@H4             | 3.355 |
|          |                                                                                                                                                                            | NO2@H3.HCO@H4              | 3.229 |
|          |                                                                                                                                                                            | Me@H1.CN@H5                | 3.151 |
|          |                                                                                                                                                                            | Me@H1.OH@H2.HCO@H5         | 3.095 |
|          |                                                                                                                                                                            | Me@H1.F@H2.HCO@H5          | 3.053 |
|          |                                                                                                                                                                            | HCO@H3.HCO@H4              | 3.048 |
|          |                                                                                                                                                                            | OEt@H1.OH@H3               | 3.045 |
|          |                                                                                                                                                                            | NO2@H1                     | 3.042 |
|          |                                                                                                                                                                            | OMe@H1.NH2@H5              | 3.028 |
| AJORAT_3 | <br>  | NO2@H1                     | 3.073 |
|          | OEt@H1                                                                                                                                                                     | 3.072                      |       |
| AJORATR  | <br> | CHCH2@H2.CHNH@H3.CHNH@H5   | 3.682 |
|          |                                                                                                                                                                            | OH@H1.Et@H3.OH@H4.OH@H5    | 3.417 |
|          |                                                                                                                                                                            | CHNH@H1.Me@H3.OH@H4.HCO@H5 | 3.341 |
|          |                                                                                                                                                                            | Me@H3.HCO@H4.HCO@H5        | 3.326 |
|          |                                                                                                                                                                            | OMe@H1.OH@H2.Et@H3         | 3.307 |
|          |                                                                                                                                                                            | MeNH2@H1.HCO@H5            | 3.214 |
|          |                                                                                                                                                                            | SO3H@H1.F@H2.OH@H3         | 3.166 |
|          |                                                                                                                                                                            | OEt@H1.F@H3.OH@H5          | 3.102 |
|          |                                                                                                                                                                            | OMe@H1.Et@H3.NH2@H5        | 3.091 |
|          |                                                                                                                                                                            | CHNH@H1.Me@H3.OH@H4.OH@H5  | 3.061 |
|          |                                                                                                                                                                            | OMe@H1.OH@H2.NHMe@H3       | 3.055 |
|          |                                                                                                                                                                            | CHCH2@H2.CHNH@H3.CONH2@H5  | 3.054 |
|          |                                                                                                                                                                            | CONH2@H1.OMe@H3.OH@H5      | 3.043 |
|          |                                                                                                                                                                            | OEte@H1.OMe@H3             | 3.042 |

|                        |                                                                                   |                                    |       |
|------------------------|-----------------------------------------------------------------------------------|------------------------------------|-------|
|                        |                                                                                   | Me@H1.HCO@H5                       | 3.031 |
|                        |                                                                                   | CHNH@H1.HCO@H3.HCO@H5              | 3.031 |
|                        |                                                                                   | CHNH@H1.CHCH2@H2.CHNH@H3.CHNH@H5   | 3.007 |
|                        |                                                                                   | OMe@H1.MeNH2@H3.OH@H5              | 3.000 |
| CoHLDMFH2O_desolvated  | 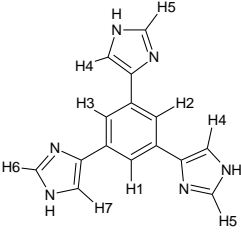 | OPre@H1.HCO@H2.CHCH2@H3.CN@H5.F@H6 | 3.190 |
|                        |                                                                                   |                                    | 3.188 |
|                        |                                                                                   | F@H1.COOH@H2.CHNH@H5               | 3.120 |
| 3.7CoHLH2O2_desolvated |  | Me@H1.Me@H2                        | 3.517 |
|                        |                                                                                   | Et@H1.HCO@H3                       | 3.455 |
|                        |                                                                                   | Me@H1.NH2@H2                       | 3.427 |
|                        |                                                                                   | CHCH2@H1.HCO@H8                    | 3.411 |
|                        |                                                                                   | HCO@H1.COOH@H3.HCO@H6              | 3.383 |
|                        |                                                                                   | Et@H1.OH@H3                        | 3.379 |
|                        |                                                                                   | OMe@H1.NH2@H2                      | 3.376 |
|                        |                                                                                   | HCO@H1.COOH@H3.F@H4.Me@H6          | 3.371 |
|                        |                                                                                   | Et@H1.NO2@H3                       | 3.355 |
|                        |                                                                                   | OMe@H1.HCO@H8                      | 3.351 |
|                        |                                                                                   | CHCH2@H1.Me@H2                     | 3.346 |
|                        |                                                                                   | Me@H1                              | 3.342 |
|                        |                                                                                   | Et@H1.HCO@H8                       | 3.340 |
|                        |                                                                                   | Et@H1.Me@H2                        | 3.337 |
|                        |                                                                                   | Me@H1.OH@H2                        | 3.332 |
|                        |                                                                                   | Me@H1.HCO@H8                       | 3.319 |
|                        |                                                                                   | CHCH2@H1.HCO@H3                    | 3.298 |
|                        |                                                                                   | NHMe@H1.HCO@H8                     | 3.285 |
|                        |                                                                                   | MeNH2@H1.HCO@H3                    | 3.279 |
|                        |                                                                                   | HCO@H1.COOH@H3.OH@H4.HCO@H6        | 3.249 |
|                        |                                                                                   | Me@H2.HCO@H6                       | 3.240 |
|                        |                                                                                   | MeNH2@H1.Me@H2                     | 3.236 |
|                        |                                                                                   | CHCH2@H1                           | 3.230 |
|                        |                                                                                   | NHMe@H1.HCO@H3                     | 3.228 |
|                        |                                                                                   | Me@H1.Cl@H2                        | 3.223 |
|                        |                                                                                   | OMe@H1.CHNH@H2                     | 3.222 |
|                        |                                                                                   | Me@H1.HCO@H3                       | 3.206 |
|                        |                                                                                   | Et@H1.NH2@H2                       | 3.202 |
|                        |                                                                                   | HCO@H1.F@H2.COOH@H3.HCO@H6         | 3.199 |
|                        |                                                                                   | CHCH2@H1.NH2@H2                    | 3.195 |

|  |  |                                   |       |
|--|--|-----------------------------------|-------|
|  |  | Et@H1                             | 3.194 |
|  |  | Me@H1.HCO@H2                      | 3.193 |
|  |  | CCH@H1.Me@H2                      | 3.193 |
|  |  | NHMe@H1.Me@H2                     | 3.190 |
|  |  | HCO@H1.NH2@H2                     | 3.171 |
|  |  | Me@H1.F@H2                        | 3.166 |
|  |  | OMe@H1                            | 3.162 |
|  |  | OH@H4.HCO@H8                      | 3.161 |
|  |  | OMe@H1.F@H6                       | 3.160 |
|  |  | OMe@H1.HCO@H3                     | 3.158 |
|  |  | CHNH@H1.Me@H2                     | 3.152 |
|  |  | HCO@H1.HCO@H3                     | 3.151 |
|  |  | CONH2@H1.Me@H2                    | 3.144 |
|  |  | HCO@H1.COOH@H3.F@H4.HCO@H6        | 3.142 |
|  |  | OMe@H1.Me@H2                      | 3.140 |
|  |  | HCO@H1.Me@H2.F@H3.OH@H6           | 3.138 |
|  |  | HCO@H1.F@H2.COOH@H3               | 3.137 |
|  |  | MeNH2@H1.OH@H3                    | 3.131 |
|  |  | CHCH2@H1.OH@H3                    | 3.125 |
|  |  | NHMe@H1.OH@H3                     | 3.123 |
|  |  | Et@H1.HCO@H7                      | 3.123 |
|  |  | OMe@H1.NO2@H7                     | 3.121 |
|  |  | OMe@H1.COOH@H7                    | 3.115 |
|  |  | CHCH2@H1.HCO@H2                   | 3.113 |
|  |  | CHCH2@H1.CHNH@H2                  | 3.112 |
|  |  | MeNH2@H1.NH2@H2                   | 3.111 |
|  |  | OMe@H1.HCO@H7                     | 3.110 |
|  |  | COOH@H1.Me@H2                     | 3.110 |
|  |  | CHCH2@H1.OH@H8                    | 3.109 |
|  |  | MeNH2@H1.HCO@H2                   | 3.105 |
|  |  | COOH@H3.F@H6                      | 3.104 |
|  |  | Et@H1.NH2@H3                      | 3.103 |
|  |  | OMe@H1.OH@H8                      | 3.100 |
|  |  | Et@H1.HCO@H2                      | 3.099 |
|  |  | OMe@H1.OH@H4                      | 3.096 |
|  |  | NHMe@H1.NH2@H2                    | 3.095 |
|  |  | NH2@H1.Me@H2                      | 3.093 |
|  |  | OMe@H1.OH@H3                      | 3.092 |
|  |  | HCO@H1.Me@H2.F@H3.F@H6            | 3.089 |
|  |  | HCO@H1.Me@H2                      | 3.088 |
|  |  | HCO@H1.CN@H2.COOH@H3.OH@H4.HCO@H6 | 3.087 |

|  |  |                                  |       |
|--|--|----------------------------------|-------|
|  |  | NH2@H1.HCO@H8                    | 3.085 |
|  |  | Et@H1.OH@H2                      | 3.076 |
|  |  | CCH@H1.NH2@H2                    | 3.074 |
|  |  | OH@H1.Me@H2                      | 3.074 |
|  |  | Et@H1.NH2@H7                     | 3.073 |
|  |  | OMe@H1.F@H2                      | 3.072 |
|  |  | Et@H1.Me@H7                      | 3.065 |
|  |  | CHNH@H1.HCO@H8                   | 3.064 |
|  |  | Et@H1.OH@H4                      | 3.063 |
|  |  | Et@H1.OH@H8                      | 3.062 |
|  |  | Me@H1.CHNH@H2                    | 3.062 |
|  |  | NHMe@H1.CHNH@H2                  | 3.056 |
|  |  | CHCH2@H1.F@H6                    | 3.053 |
|  |  | CCH@H1.HCO@H8                    | 3.049 |
|  |  | CONH2@H1.NH2@H2                  | 3.047 |
|  |  | NH2@H2                           | 3.045 |
|  |  | HCO@H1.Me@H2.HCO@H4.HCO@H6.OH@H8 | 3.044 |
|  |  | Et@H1.CHNH@H2                    | 3.041 |
|  |  | COOH@H1.NH2@H2                   | 3.039 |
|  |  | OMe@H1.Me@H7                     | 3.038 |
|  |  | Et@H1.F@H6                       | 3.037 |
|  |  | CCH@H1.CHNH@H2                   | 3.033 |
|  |  | CHNH@H1.HCO@H3                   | 3.033 |
|  |  | NO2@H1.OH@H4                     | 3.033 |
|  |  | CHCH2@H1.OH@H2                   | 3.029 |
|  |  | Me@H1.Me@H2.NH2@H3.OH@H4.CHNH@H6 | 3.023 |
|  |  | Et@H1.Cl@H3                      | 3.022 |
|  |  | Me@H2                            | 3.022 |
|  |  | CHCH2@H1.F@H2                    | 3.021 |
|  |  | Me@H1.F@H6                       | 3.018 |
|  |  | Et@H1.NO2@H7                     | 3.014 |
|  |  | CHNH@H1.NH2@H2                   | 3.013 |
|  |  | OMe@H1.HCO@H2                    | 3.013 |
|  |  | Et@H1.Cl@H2                      | 3.011 |
|  |  | NHMe@H1                          | 3.009 |
|  |  | NHMe@H1.HCO@H2                   | 3.007 |
|  |  | Me@H1.OH@H3                      | 3.006 |
|  |  | CHCH2@H1.Me@H8                   | 3.004 |
|  |  | OH@H1                            | 3.004 |
|  |  | NHMe@H1.OH@H8                    | 3.004 |

|        |                                                                                     |                                    |       |
|--------|-------------------------------------------------------------------------------------|------------------------------------|-------|
| CUHPUR | 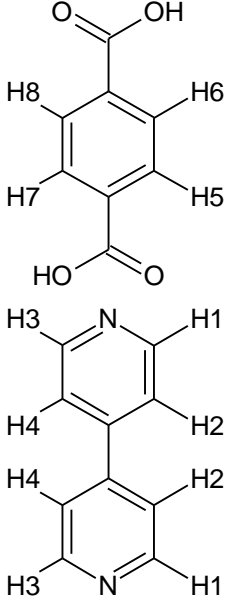   | CHCH2@H1.OH@H2.HCO@H3.F@H7         | 3.170 |
|        |                                                                                     | CHCH2@H1.OH@H2.CHCH2@H3.F@H5.Me@H7 | 3.097 |
| HECQUB |   | NH2@H1.CONH2@H2.MeNH2@H3           | 3.765 |
|        |                                                                                     | NH2@H1.HCO@H2.MeNH2@H3             | 3.512 |
|        |                                                                                     | NH2@H1.OEt@H2.HCO@H3               | 3.462 |
|        |                                                                                     | NH2@H1.OEt@H2.MeNH2@H3             | 3.461 |
|        |                                                                                     | NH2@H1.COOH@H2.MeNH2@H3            | 3.458 |
|        |                                                                                     | NH2@H1.CHNH@H2.MeNH2@H3            | 3.332 |
|        |                                                                                     | OEt@H2.HCO@H3                      | 3.293 |
|        |                                                                                     | NH2@H1.OEt@H2.NH2@H3               | 3.287 |
|        |                                                                                     | Br@H1.CONH2@H2.MeNH2@H3            | 3.176 |
|        |                                                                                     | Cl@H1.COOH@H2.MeNH2@H3             | 3.148 |
|        |                                                                                     | Cl@H1.HCO@H2.MeNH2@H3              | 3.142 |
|        |                                                                                     | NH2@H1.Me@H2.MeNH2@H3              | 3.138 |
|        |                                                                                     | HCO@H1.CONH2@H2.CCH@H3             | 3.132 |
|        |                                                                                     | HCO@H1.HCO@H2.CHCH2@H3             | 3.044 |
|        |                                                                                     | NH2@H1.CONH2@H2.Me@H3              | 3.043 |
|        |                                                                                     | HCO@H1.CONH2@H2.NH2@H3             | 3.023 |
| HIFTOG |  | HCO@H1.MeNH2@H2.HCO@H3.COOH@H4     | 3.114 |

|                                      |                                                                                     |                                           |       |
|--------------------------------------|-------------------------------------------------------------------------------------|-------------------------------------------|-------|
|                                      | 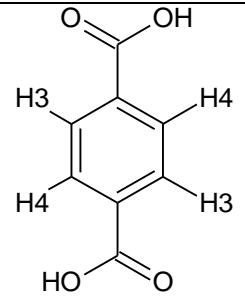   |                                           |       |
| In_MOF                               |    | F@H2                                      | 3.087 |
|                                      |                                                                                     | OH@H2                                     | 3.087 |
|                                      |                                                                                     |                                           | 3.069 |
| InMOFKorea                           |   | Me@H1                                     | 3.345 |
|                                      |                                                                                     | OMe@H1.Me@H3                              | 3.103 |
|                                      |                                                                                     | F@H1.CHNH@H3                              | 3.027 |
| InMOFKorea_6                         |  | NH2@H1.CHCH2@H2                           | 3.627 |
|                                      |                                                                                     | NH2@H2.OH@H3.HCO@H4.SO3H@H5.NH2@H6        | 3.423 |
|                                      |                                                                                     | Me@H1                                     | 3.345 |
|                                      |                                                                                     | Me@H1.HCO@H2.F@H3                         | 3.338 |
|                                      |                                                                                     | Me@H2.OH@H3.HCO@H4.SO3H@H5.NH2@H6         | 3.334 |
|                                      |                                                                                     | OH@H1.F@H2.CN@H3.NH2@H4.OPre@H5.NO2@H6    | 3.302 |
|                                      |                                                                                     | Me@H1.NO2@H2.NH2@H3.HCO@H4.SO3H@H5.HCO@H6 | 3.288 |
|                                      |                                                                                     | NH2@H1.OPre@H3.OH@H4.HCO@H5.NH2@H6        | 3.259 |
|                                      |                                                                                     | NH2@H2.Me@H3.HCO@H4.Me@H5.NH2@H6          | 3.245 |
|                                      |                                                                                     | F@H1.OH@H2.OPre@H3.HCO@H5.NH2@H6          | 3.232 |
|                                      |                                                                                     | F@H1.OPre@H3.HCO@H4.HCO@H5.OH@H6          | 3.227 |
|                                      |                                                                                     | NH2@H1.OH@H2.OPre@H3.F@H4.OH@H5.Me@H6     | 3.225 |
|                                      |                                                                                     | NH2@H1.Me@H2.NH2@H4.F@H5                  | 3.193 |
| Me@H1.Me@H2.Me@H3.F@H4.OPre@H5.SO3H@ | 3.170                                                                               |                                           |       |

|         |                                                                                                                                                                           |                                         |       |
|---------|---------------------------------------------------------------------------------------------------------------------------------------------------------------------------|-----------------------------------------|-------|
|         |                                                                                                                                                                           | H6                                      |       |
|         |                                                                                                                                                                           | NH2@H1.F@H2.OPre@H3.OH@H4.HCO@H5.NH2@H6 | 3.170 |
|         |                                                                                                                                                                           | H@H6                                    |       |
|         |                                                                                                                                                                           | NH2@H1.Me@H2.OPre@H3.HCO@H4.HCO@H5.O    | 3.129 |
|         |                                                                                                                                                                           | H@H6                                    |       |
|         |                                                                                                                                                                           | NH2@H2.NH2@H4.NH2@H5.NH2@H6             | 3.117 |
|         |                                                                                                                                                                           | OMe@H1.Me@H3                            | 3.103 |
|         |                                                                                                                                                                           | Me@H1.Me@H3.OH@H4.SO3H@H5               | 3.082 |
|         |                                                                                                                                                                           | Me@H1.OH@H2.OPre@H3.NH2@H5.Me@H6        | 3.062 |
|         |                                                                                                                                                                           | NO2@H2.OPre@H3.OH@H4.HCO@H5.Cl@H6       | 3.062 |
|         |                                                                                                                                                                           | OH@H1.Me@H2.NH2@H3.OH@H5.NH2@H6         | 3.038 |
|         |                                                                                                                                                                           | F@H1.CHNH@H3                            | 3.027 |
|         |                                                                                                                                                                           | NH2@H1.OH@H2.OH@H3.Me@H4.HCO@H5.SO3     | 3.026 |
|         |                                                                                                                                                                           | H@H6                                    |       |
|         |                                                                                                                                                                           | NO2@H1.NO2@H2.NH2@H3.HCO@H4.SO3H@H5.    | 3.015 |
|         |                                                                                                                                                                           | HCO@H6                                  |       |
|         |                                                                                                                                                                           | COOH@H2.OH@H3.HCO@H4.SO3H@H5.NH2@H6     | 3.014 |
|         |                                                                                                                                                                           | OH@H1.Me@H2.OPre@H3.NH2@H6              | 3.009 |
|         |                                                                                                                                                                           | Me@H2.CONH2@H3.HCO@H4.SO3H@H5.NH2@H     | 3.007 |
|         |                                                                                                                                                                           | 6                                       |       |
| ISOHEE  | 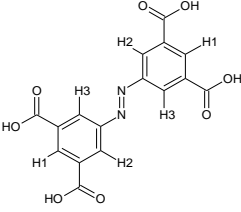<br> | CCH@H2.HCO@H3.Me@H4                     | 3.550 |
|         |                                                                                                                                                                           | Me@H2.HCO@H3.Et@H4.NO2@H7               | 3.399 |
|         |                                                                                                                                                                           | Me@H2.CCH@H3.Et@H4                      | 3.330 |
|         |                                                                                                                                                                           | CCH@H2.NO2@H3.Et@H4                     | 3.300 |
|         |                                                                                                                                                                           | OMe@H2.Me@H3.HCO@H4                     | 3.296 |
|         |                                                                                                                                                                           | HCO@H2.CCH@H3.Et@H4                     | 3.142 |
|         |                                                                                                                                                                           | HCO@H2.HCO@H3.HCO@H4                    | 3.129 |
|         |                                                                                                                                                                           | Me@H1.Me@H2.HCO@H3.Et@H4.NO2@H7         | 3.103 |
|         |                                                                                                                                                                           | CCH@H2.NH2@H3.MeNH2@H4                  | 3.101 |
|         |                                                                                                                                                                           | CCH@H2.Me@H3.Me@H4                      | 3.077 |
|         |                                                                                                                                                                           | HCO@H2.HCO@H3.Et@H4                     | 3.059 |
|         |                                                                                                                                                                           | NO2@H2.Me@H3.Me@H4                      | 3.042 |
| MIL-47A |                                                                                                                                                                           | HCO@H1                                  | 3.568 |
|         |                                                                                                                                                                           | HCO@H2                                  | 3.520 |
|         |                                                                                                                                                                           | CHCH2@H2                                | 3.368 |
|         |                                                                                                                                                                           | CHCH2@H1                                | 3.297 |
|         |                                                                                                                                                                           | CONH2@H1                                | 3.082 |
|         |                                                                                                                                                                           | CONH2@H2                                | 3.078 |
|         |                                                                                                                                                                           | CHNH@H2                                 | 3.024 |
|         |                                                                                                                                                                           | CHNH@H1                                 | 3.023 |



|         |                                                                                     |                      |       |
|---------|-------------------------------------------------------------------------------------|----------------------|-------|
|         | 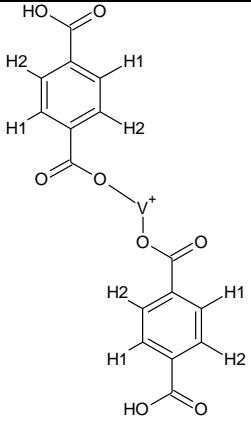   |                      |       |
| MIL-47B |   | CHNH@H1              | 3.946 |
|         |                                                                                     | COOH@H1              | 3.862 |
|         |                                                                                     | HCO@H1               | 3.560 |
|         |                                                                                     | CONH2@H2             | 3.086 |
| MITSUE  |  | NH2@H1.OEt@H2.NO2@H3 | 3.555 |
|         |                                                                                     | Me@H1.Pr@H2.NH2@H3   | 3.266 |
|         |                                                                                     | HCO@H1.OEt@H2        | 3.252 |
|         |                                                                                     | NH2@H1.CCH@H2.CCH@H3 | 3.243 |
|         |                                                                                     | Me@H1.Pr@H2.Me@H3    | 3.200 |
|         |                                                                                     | CCH@H2.CCH@H3        | 3.106 |
|         |                                                                                     | Me@H1.Pr@H2.HCO@H3   | 3.068 |
|         |                                                                                     | NH2@H1.Pr@H2.Me@H3   | 3.007 |
| MOYZIK  |  | OPre@H2.Ph@H4.HCO@H5 | 3.001 |

|                     |      |                                     |       |
|---------------------|------|-------------------------------------|-------|
|                     |      |                                     |       |
| NJU-Bai7            |      |                                     | 3.065 |
| TIF-A1-desolvated-6 | <br> | MeNH2@H1.OH@H2.NH2@H3.OH@H4.OPre@H6 | 3.132 |
| TONXIE              | <br> | SO3H@H1.OMe@H2                      | 3.168 |
|                     |      | COOH@H1.OMe@H2.CHNH@H3              | 3.044 |
|                     |      | NH2@H1.OMe@H2.HCO@H3                | 3.042 |
| UTEXAT              |      | HCO@H2.Me@H3                        | 4.360 |
|                     |      | Me@H2.Me@H3                         | 4.360 |
|                     |      | CN@H2.Me@H3                         | 4.270 |

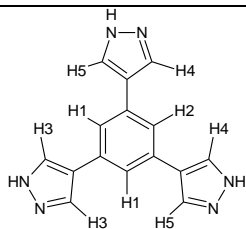

|  |                       |       |
|--|-----------------------|-------|
|  | COOH@H2.Me@H3         | 4.252 |
|  | NO2@H2                | 4.241 |
|  | CCH@H2.Me@H3          | 4.229 |
|  | NO2@H2.Me@H3          | 4.213 |
|  | OH@H2.Me@H3           | 4.206 |
|  | Me@H3.OH@H4           | 4.177 |
|  | NH2@H2.Me@H3          | 4.144 |
|  | Cl@H2.Me@H3           | 4.102 |
|  | Me@H2.Me@H3.OH@H4     | 4.094 |
|  | CONH2@H2.Me@H3        | 4.080 |
|  | HCO@H2                | 4.039 |
|  | CHNH@H2.Me@H3         | 4.032 |
|  | OH@H3.OH@H4           | 4.022 |
|  | CN@H2.NH2@H3          | 4.009 |
|  | HCO@H2.CHNH@H3        | 4.005 |
|  | CHNH@H2.Me@H3.OH@H4   | 3.993 |
|  | NH2@H2.Me@H3.OH@H4    | 3.940 |
|  | CCH@H2.Me@H3.OH@H4    | 3.917 |
|  | Me@H2.HCO@H3          | 3.910 |
|  | HCO@H2.Me@H3.OH@H4    | 3.907 |
|  | CHCH2@H2.Me@H3        | 3.903 |
|  | COOH@H2.CHNH@H3       | 3.884 |
|  | CONH2@H2              | 3.869 |
|  | COOH@H2               | 3.868 |
|  | OH@H2.Me@H3.OH@H4     | 3.860 |
|  | OH@H2.OH@H3           | 3.842 |
|  | OMe@H2.Me@H3          | 3.840 |
|  | COOH@H2.OH@H3         | 3.837 |
|  | MeNH2@H2.Me@H3        | 3.833 |
|  | HCO@H2.NH2@H3         | 3.833 |
|  | MeNH2@H2.OH@H4        | 3.826 |
|  | NO2@H2.OH@H3          | 3.826 |
|  | Cl@H2.Me@H3.OH@H4     | 3.813 |
|  | CONH2@H2.NH2@H3.OH@H4 | 3.811 |
|  | OH@H2.HCO@H3          | 3.801 |
|  | Br@H2.Me@H3           | 3.800 |
|  | NH2@H2.NH2@H3         | 3.798 |
|  | Me@H3.F@H4            | 3.796 |
|  | F@H2.Me@H3.OH@H4      | 3.788 |
|  | Me@H2.NH2@H3          | 3.779 |
|  | NH2@H2.OH@H3          | 3.766 |

|  |  |                        |       |
|--|--|------------------------|-------|
|  |  | MeNH2@H2.NH2@H3        | 3.766 |
|  |  | HCO@H2.HCO@H3          | 3.764 |
|  |  | COOH@H2.HCO@H3         | 3.759 |
|  |  | CCH@H2.NH2@H3          | 3.754 |
|  |  | OH@H4                  | 3.738 |
|  |  | CONH2@H2.HCO@H3        | 3.713 |
|  |  | OMe@H2.NH2@H3          | 3.708 |
|  |  | COOH@H2.Me@H3.OH@H4    | 3.704 |
|  |  | COOH@H2.HCO@H3.F@H5    | 3.700 |
|  |  | Me@H2.HCO@H3.F@H5      | 3.698 |
|  |  | OH@H2.HCO@H4           | 3.687 |
|  |  | OH@H2                  | 3.684 |
|  |  | COOH@H2.Cl@H3          | 3.680 |
|  |  | NHMe@H2.HCO@H3         | 3.677 |
|  |  | NO2@H2.Cl@H3           | 3.674 |
|  |  | HCO@H2.NH2@H3.OH@H4    | 3.670 |
|  |  | Me@H3                  | 3.664 |
|  |  | Me@H2.OH@H3            | 3.658 |
|  |  | HCO@H2.Me@H3.F@H4      | 3.656 |
|  |  | CCH@H2.Me@H3.F@H4      | 3.655 |
|  |  | Cl@H2.HCO@H3           | 3.645 |
|  |  | Me@H2.Me@H3.OH@H4.F@H5 | 3.636 |
|  |  | OH@H2.OH@H4            | 3.634 |
|  |  | MeNH2@H2.HCO@H3        | 3.631 |
|  |  | NH2@H2.HCO@H3          | 3.631 |
|  |  | HCO@H2.HCO@H4          | 3.628 |
|  |  | NH2@H2.Me@H3.F@H4      | 3.621 |
|  |  | NO2@H4                 | 3.620 |
|  |  | CN@H2.Cl@H3            | 3.616 |
|  |  | CONH2@H2.Me@H3.OH@H4   | 3.614 |
|  |  | HCO@H2.OH@H4           | 3.604 |
|  |  | OH@H2.NO2@H4           | 3.582 |
|  |  | NO2@H2.NH2@H3          | 3.564 |
|  |  | COOH@H2.NH2@H3.F@H4    | 3.564 |
|  |  | COOH@H2.NH2@H3         | 3.558 |
|  |  | CHCH2@H2.HCO@H3        | 3.558 |
|  |  | CN@H2.Me@H3.F@H4       | 3.557 |
|  |  | OH@H3.NH2@H4           | 3.556 |
|  |  | Me@H3.NH2@H4           | 3.555 |
|  |  | Br@H2.NH2@H3           | 3.546 |
|  |  | Cl@H2.NH2@H3           | 3.540 |

|  |  |                         |       |
|--|--|-------------------------|-------|
|  |  | NH2@H2.OH@H4            | 3.539 |
|  |  | HCO@H2.Cl@H3            | 3.539 |
|  |  | Me@H2.Cl@H3             | 3.538 |
|  |  | F@H2.HCO@H4             | 3.530 |
|  |  | CCH@H2.Cl@H3            | 3.525 |
|  |  | CONH2@H2.NH2@H3         | 3.521 |
|  |  | CCH@H2.Me@H3.OH@H4.F@H5 | 3.520 |
|  |  | COOH@H2.NH2@H3.F@H5     | 3.517 |
|  |  | OMe@H2.HCO@H3.F@H5      | 3.515 |
|  |  | NO2@H2.Me@H3.OH@H4      | 3.513 |
|  |  | HCO@H2.Me@H3.HCO@H4     | 3.510 |
|  |  | COOH@H2.Me@H3.F@H4      | 3.504 |
|  |  | HCO@H4                  | 3.501 |
|  |  | F@H2.Me@H3.F@H4         | 3.496 |
|  |  | Et@H2.Me@H3             | 3.492 |
|  |  | CN@H2.CHNH@H3           | 3.486 |
|  |  | Me@H2.HCO@H3.OH@H4      | 3.478 |
|  |  | Cl@H2.CHNH@H3           | 3.475 |
|  |  | CHCH2@H2.NH2@H3         | 3.470 |
|  |  | CHNH@H2.NH2@H3.OH@H4    | 3.469 |
|  |  | CCH@H2.OH@H4            | 3.465 |
|  |  | CN@H2.Me@H3.OH@H4       | 3.462 |
|  |  | OH@H2.HCO@H3.F@H5       | 3.461 |
|  |  | OEt@H2                  | 3.457 |
|  |  | NH2@H2.HCO@H3.F@H5      | 3.455 |
|  |  | Pr@H2.Me@H3             | 3.449 |
|  |  | COOH@H2.OH@H5           | 3.447 |
|  |  | Et@H2.HCO@H3            | 3.445 |
|  |  | MeNH2@H3                | 3.435 |
|  |  | F@H2.NH2@H3             | 3.433 |
|  |  | Me@H3.HCO@H4            | 3.432 |
|  |  | CCH@H2.HCO@H3.F@H5      | 3.430 |
|  |  | MeNH2@H2                | 3.430 |
|  |  | HCO@H3.F@H5             | 3.427 |
|  |  | OMe@H2                  | 3.425 |
|  |  | OH@H2.Me@H3.F@H4        | 3.424 |
|  |  | NO2@H2.Me@H3.F@H4       | 3.417 |
|  |  | OEte@H2.Me@H3           | 3.416 |
|  |  | OMe@H2.Cl@H3            | 3.415 |
|  |  | CN@H2.OH@H3             | 3.413 |
|  |  | NH2@H2.CHNH@H3          | 3.410 |

|  |  |                        |       |
|--|--|------------------------|-------|
|  |  | CHCH2@H2.NH2@H4        | 3.405 |
|  |  | CHNH@H2.HCO@H3         | 3.404 |
|  |  | MeNH2@H2.Cl@H3         | 3.402 |
|  |  | NH2@H2.Cl@H3           | 3.400 |
|  |  | NHMe@H2.Cl@H3          | 3.398 |
|  |  | Me@H2.NH2@H3.OH@H4     | 3.397 |
|  |  | NO2@H2.OH@H5           | 3.396 |
|  |  | F@H2.OH@H4             | 3.391 |
|  |  | CN@H2                  | 3.381 |
|  |  | CCH@H2                 | 3.381 |
|  |  | OEt@H2.Me@H3           | 3.379 |
|  |  | Br@H2.HCO@H3           | 3.367 |
|  |  | Me@H2.OH@H4.Me@H5      | 3.365 |
|  |  | NH2@H3.HCO@H4          | 3.363 |
|  |  | Me@H3.OH@H4.F@H5       | 3.359 |
|  |  | CHNH@H2.Cl@H3          | 3.357 |
|  |  | CHNH@H2.HCO@H3.OH@H4   | 3.351 |
|  |  | CHNH@H2.OH@H4          | 3.350 |
|  |  | F@H2.OH@H3.OH@H4       | 3.349 |
|  |  | F@H2.Me@H3             | 3.349 |
|  |  | NH2@H2.HCO@H4          | 3.344 |
|  |  | CN@H2.Me@H3.OH@H4.F@H5 | 3.343 |
|  |  | COOH@H2.OH@H4          | 3.342 |
|  |  | OH@H2.Me@H3.HCO@H4     | 3.340 |
|  |  | Et@H2.Cl@H3            | 3.337 |
|  |  | CCH@H2.Me@H3.F@H5      | 3.337 |
|  |  | Me@H2.OH@H3.OH@H5      | 3.337 |
|  |  | CCH@H2.Cl@H3.OH@H4     | 3.336 |
|  |  | Me@H2.CHNH@H3          | 3.327 |
|  |  | NH2@H4                 | 3.326 |
|  |  | CHNH@H2.NH2@H3.NH2@H4  | 3.324 |
|  |  | Cl@H2.Cl@H3            | 3.323 |
|  |  | NH2@H2.Me@H3.NH2@H4    | 3.322 |
|  |  | Me@H4                  | 3.322 |
|  |  | CHNH@H2.Me@H3.F@H4     | 3.320 |
|  |  | Et@H2.OH@H3            | 3.320 |
|  |  | NH2@H2.Me@H3.F@H5      | 3.319 |
|  |  | OH@H3.HCO@H4           | 3.318 |
|  |  | OEt@H2.OH@H4           | 3.312 |
|  |  | NO2@H2.Me@H3.F@H5      | 3.312 |
|  |  | Cl@H2.Me@H3.F@H4       | 3.312 |

|  |  |                           |       |
|--|--|---------------------------|-------|
|  |  | HCO@H2.NH2@H4             | 3.309 |
|  |  | Me@H2.Me@H3.F@H5          | 3.308 |
|  |  | COOH@H2.Me@H3.OH@H4.F@H5  | 3.308 |
|  |  | OEt@H2.NH2@H3             | 3.306 |
|  |  | NO2@H2.HCO@H3             | 3.306 |
|  |  | MeNH2@H2.HCO@H3.F@H5      | 3.305 |
|  |  | CHNH@H2.HCO@H4            | 3.304 |
|  |  | HCO@H3                    | 3.303 |
|  |  | CCH@H2.NH2@H3.OH@H4       | 3.303 |
|  |  | HCO@H3.OH@H4              | 3.302 |
|  |  | OH@H2.Me@H3.NH2@H4        | 3.300 |
|  |  | Br@H2.Me@H3.OH@H4         | 3.300 |
|  |  | F@H2.HCO@H3               | 3.296 |
|  |  | Et@H2.NH2@H3              | 3.292 |
|  |  | OH@H2.Cl@H3               | 3.290 |
|  |  | NH2@H2.HCO@H3.OH@H4       | 3.287 |
|  |  | OH@H2.Me@H4               | 3.283 |
|  |  | NH2@H2.Cl@H3.OH@H4        | 3.276 |
|  |  | COOH@H2.Me@H3.HCO@H4      | 3.274 |
|  |  | HCO@H2.OH@H5              | 3.271 |
|  |  | NH2@H2.NH2@H3.F@H5        | 3.269 |
|  |  | Pr@H2                     | 3.268 |
|  |  | CHCH2@H2                  | 3.267 |
|  |  | OEt@H2.HCO@H3             | 3.266 |
|  |  | OH@H2.NH2@H4              | 3.262 |
|  |  | OMe@H3.OH@H4              | 3.261 |
|  |  | HCO@H2.Me@H3.F@H5         | 3.259 |
|  |  | HCO@H2.CHNH@H3.OH@H4      | 3.258 |
|  |  | COOH@H2.Me@H3.F@H5        | 3.257 |
|  |  | NH2@H2.Me@H3.HCO@H4.OH@H5 | 3.256 |
|  |  | I@H2.Me@H3                | 3.256 |
|  |  | CCH@H3.OH@H4              | 3.252 |
|  |  | HCO@H4.NH2@H5             | 3.252 |
|  |  | Cl@H2.Me@H3.NH2@H4        | 3.249 |
|  |  | Cl@H2.OH@H4               | 3.245 |
|  |  | CCH@H2.Me@H3.NH2@H4       | 3.242 |
|  |  | CN@H2.OH@H4               | 3.241 |
|  |  | NO2@H2.NO2@H3             | 3.238 |
|  |  | CN@H2.Me@H3.F@H5          | 3.235 |
|  |  | NH2@H2.OH@H5              | 3.234 |
|  |  | CF3@H2.Me@H3              | 3.234 |

|  |  |                           |       |
|--|--|---------------------------|-------|
|  |  | NO2@H2.F@H5               | 3.233 |
|  |  | Cl@H2.OH@H3               | 3.233 |
|  |  | CHNH@H2.NH2@H3            | 3.228 |
|  |  | COOH@H2.NH2@H3.OH@H4      | 3.225 |
|  |  | HCO@H2.Me@H3.OH@H4.F@H5   | 3.224 |
|  |  | MeNH2@H2.OH@H3            | 3.222 |
|  |  | Me@H2.Cl@H3.OH@H4         | 3.222 |
|  |  | OH@H4.MeNH2@H5            | 3.221 |
|  |  | CCH@H3                    | 3.217 |
|  |  | HCO@H2.Cl@H3.OH@H4        | 3.217 |
|  |  | SO3H@H2.Me@H3             | 3.216 |
|  |  | Me@H2.NH2@H3.F@H4         | 3.215 |
|  |  | OH@H3                     | 3.213 |
|  |  | Cl@H2.HCO@H3.F@H5         | 3.213 |
|  |  | NH2@H2.Me@H3.OH@H4.F@H5   | 3.211 |
|  |  | OH@H3.F@H4                | 3.207 |
|  |  | CCH@H2.CHNH@H3.OH@H4      | 3.204 |
|  |  | OMe@H2.Me@H3.F@H5         | 3.204 |
|  |  | Pr@H2.OH@H3               | 3.204 |
|  |  | COOH@H2.Et@H3.OH@H4.OH@H5 | 3.204 |
|  |  | CN@H2.NH2@H3.F@H5         | 3.204 |
|  |  | Me@H2.Me@H3.HCO@H4.F@H5   | 3.203 |
|  |  | Me@H2                     | 3.202 |
|  |  | OH@H1.Cl@H2.CCH@H3.Me@H5  | 3.197 |
|  |  | COOH@H2.NH2@H4            | 3.197 |
|  |  | OH@H2.HCO@H4.CN@H5        | 3.194 |
|  |  | CONH2@H2.Me@H3.F@H4       | 3.190 |
|  |  | OEt@H2                    | 3.190 |
|  |  | NO2@H2.OH@H4              | 3.189 |
|  |  | NH2@H3                    | 3.186 |
|  |  | Me@H2.Me@H3.HCO@H4        | 3.186 |
|  |  | NH2@H2.HCO@H3.NH2@H4      | 3.185 |
|  |  | F@H2.Me@H3.NH2@H4         | 3.184 |
|  |  | OH@H3.NO2@H4              | 3.183 |
|  |  | CHNH@H2.CHNH@H3           | 3.183 |
|  |  | NH2@H3.F@H4               | 3.183 |
|  |  | NHMe@H2.Me@H3             | 3.182 |
|  |  | OH@H2.NH2@H3.F@H5         | 3.180 |
|  |  | NO2@H2.CCH@H3             | 3.179 |
|  |  | Et@H2                     | 3.176 |
|  |  |                           | 3.176 |



|  |  |                            |       |
|--|--|----------------------------|-------|
|  |  | CONH2@H2.Me@H3.NH2@H4      | 3.176 |
|  |  | NHMe@H2.HCO@H3.F@H5        | 3.175 |
|  |  | CHCH2@H2.CHNH@H3           | 3.170 |
|  |  | OH@H2.CCH@H3.OH@H4         | 3.169 |
|  |  | OEt@H2.HCO@H3              | 3.168 |
|  |  | CONH2@H2.CHNH@H3           | 3.167 |
|  |  | Me@H2.OH@H4.CN@H5          | 3.164 |
|  |  | CCH@H2.Me@H3.OH@H4.OH@H5   | 3.162 |
|  |  | HCO@H2.Me@H3.NH2@H4        | 3.162 |
|  |  | CONH2@H2.Me@H3.OH@H4.F@H5  | 3.162 |
|  |  | Me@H2.OH@H3.OH@H4          | 3.161 |
|  |  | OH@H2.NO2@H4.OH@H5         | 3.159 |
|  |  | Cl@H2.Et@H3.OH@H4          | 3.159 |
|  |  | NH2@H2.Me@H3.HCO@H4        | 3.158 |
|  |  | CN@H2.Me@H3.NH2@H4         | 3.156 |
|  |  | CCH@H2.CHNH@H3             | 3.155 |
|  |  | COOH@H2.Me@H3.NH2@H4       | 3.154 |
|  |  | F@H2.OMe@H3.OH@H4          | 3.154 |
|  |  | CONH2@H2.HCO@H3.F@H5       | 3.154 |
|  |  | CCH@H2.OH@H4.NH2@H5        | 3.152 |
|  |  | Pr@H2.NH2@H3               | 3.152 |
|  |  | NH2@H2.HCO@H3.OH@H5        | 3.148 |
|  |  | NH2@H2.OH@H3.OH@H4         | 3.147 |
|  |  | CHCH2@H2.Cl@H3             | 3.147 |
|  |  | NH2@H2.MeNH2@H3            | 3.146 |
|  |  | Br@H2.Cl@H3                | 3.146 |
|  |  | I@H2.HCO@H3                | 3.145 |
|  |  | NHMe@H2                    | 3.144 |
|  |  | HCO@H2.F@H4                | 3.142 |
|  |  | CN@H2.HCO@H3.OH@H4.F@H5    | 3.141 |
|  |  | HCO@H2.F@H5                | 3.139 |
|  |  | OH@H2.CCH@H3               | 3.136 |
|  |  | CHNH@H2.Me@H3.OH@H4.NH2@H5 | 3.134 |
|  |  | COOH@H2.HCO@H3.NH2@H4      | 3.132 |
|  |  | OMe@H2.CHNH@H3             | 3.132 |
|  |  | OH@H2.OH@H3.NH2@H4         | 3.129 |
|  |  | CHNH@H3.OH@H4              | 3.128 |
|  |  | CCH@H2.HCO@H3              | 3.128 |
|  |  | OMe@H2.HCO@H3              | 3.127 |
|  |  | Et@H2.HCO@H3.F@H5          | 3.126 |
|  |  | SO3H@H2.NH2@H3             | 3.125 |

|  |  |                            |       |
|--|--|----------------------------|-------|
|  |  | Cl@H2.Me@H3.OH@H4.F@H5     | 3.125 |
|  |  | HCO@H2.OH@H3.NH2@H4        | 3.125 |
|  |  | Me@H2.OH@H3.F@H5           | 3.122 |
|  |  | Me@H2.NO2@H3               | 3.118 |
|  |  | CCH@H2.Me@H3.Me@H4         | 3.114 |
|  |  | OEt@H2.NH2@H3              | 3.113 |
|  |  | Et@H2.OH@H3.OH@H4.Et@H5    | 3.113 |
|  |  | CHNH@H2.Me@H3.NH2@H4       | 3.111 |
|  |  | CHNH@H3                    | 3.110 |
|  |  | NO2@H2.NH2@H4              | 3.109 |
|  |  | OMe@H2.OH@H3               | 3.109 |
|  |  | CN@H2.HCO@H3.F@H5          | 3.105 |
|  |  | Me@H2.HCO@H4               | 3.105 |
|  |  | CN@H2.NH2@H3.OH@H4         | 3.104 |
|  |  | HCO@H2.OH@H3.F@H5          | 3.103 |
|  |  | CONH2@H2.HCO@H3.OH@H4.F@H5 | 3.101 |
|  |  | CONH2@H2.OH@H5             | 3.100 |
|  |  | CN@H2.OH@H3.NH2@H4         | 3.100 |
|  |  | CF3@H2.HCO@H3              | 3.098 |
|  |  | Me@H2.Me@H3.OH@H4.OH@H5    | 3.098 |
|  |  | Me@H2.NH2@H4               | 3.096 |
|  |  | MeNH2@H2.NO2@H3            | 3.095 |
|  |  | Me@H2.OH@H4.OH@H5          | 3.095 |
|  |  | CONH2@H1.NH2@H2.NH2@H5     | 3.093 |
|  |  | HCO@H2.NO2@H3              | 3.090 |
|  |  | NO2@H2.NH2@H5              | 3.089 |
|  |  | NO2@H2.OH@H3.NH2@H4        | 3.088 |
|  |  | CCH@H2.NH2@H3.F@H4         | 3.087 |
|  |  | OH@H2.Me@H3.F@H5           | 3.086 |
|  |  | Me@H2.OH@H5                | 3.085 |
|  |  | COOH@H2.HCO@H3.F@H4        | 3.085 |
|  |  | Et@H2.NH2@H3.OH@H5         | 3.085 |
|  |  | OH@H3.OH@H4.NH2@H5         | 3.084 |
|  |  | MeNH2@H2.CHNH@H3           | 3.084 |
|  |  | COOH@H2.CHNH@H3.OH@H4      | 3.084 |
|  |  | OH@H2.Cl@H3.OH@H4          | 3.074 |
|  |  | NH2@H3.MeNH2@H4            | 3.073 |
|  |  | NH2@H2.MeNH2@H3.OH@H4      | 3.072 |
|  |  | CONH2@H2.Cl@H3.OH@H4       | 3.071 |
|  |  | F@H2.CCH@H3.OH@H4          | 3.069 |
|  |  | NH2@H2.NH2@H4              | 3.066 |

|  |  |                            |       |
|--|--|----------------------------|-------|
|  |  | Cl@H2.NH2@H3.OH@H4         | 3.064 |
|  |  | OH@H2.MeNH2@H3.OH@H4       | 3.064 |
|  |  | CONH2@H2.Me@H3.F@H5        | 3.064 |
|  |  | Me@H2.HCO@H3.OH@H4.F@H5    | 3.064 |
|  |  | Me@H2.Me@H3.OH@H4.CONH2@H5 | 3.063 |
|  |  | OH@H1.OH@H2.OH@H3.Me@H5    | 3.063 |
|  |  | Cl@H2                      | 3.062 |
|  |  | CCH@H2.NH2@H3.HCO@H4       | 3.061 |
|  |  | HCO@H2.OH@H3.OH@H4         | 3.060 |
|  |  | F@H2.Cl@H3                 | 3.060 |
|  |  | Me@H4.OH@H5                | 3.059 |
|  |  | COOH@H2.F@H4               | 3.058 |
|  |  | Cl@H3                      | 3.057 |
|  |  | NHMe@H2.OH@H4              | 3.057 |
|  |  | Me@H2.OH@H4                | 3.056 |
|  |  | HCO@H2.CCH@H3              | 3.056 |
|  |  | CCH@H2.HCO@H3.OH@H4        | 3.055 |
|  |  | OH@H2.Me@H3.OH@H4.F@H5     | 3.055 |
|  |  | NH2@H2.HCO@H4.CCH@H5       | 3.053 |
|  |  | OH@H1.CN@H3.NH2@H5         | 3.053 |
|  |  | OH@H2.MeNH2@H3             | 3.050 |
|  |  | MeNH2@H2.OH@H5             | 3.047 |
|  |  | Cl@H2.OH@H4.CN@H5          | 3.047 |
|  |  | OH@H2.HCO@H3.OH@H4         | 3.045 |
|  |  | F@H2.OH@H3                 | 3.045 |
|  |  | OH@H2.NH2@H3.OH@H4         | 3.043 |
|  |  | OH@H2.Cl@H4                | 3.043 |
|  |  | CN@H2.NH2@H4               | 3.043 |
|  |  | OEt@H2.F@H4                | 3.041 |
|  |  | F@H2.Me@H3.OH@H4.F@H5      | 3.038 |
|  |  | COOH@H2.OH@H3.NH2@H4       | 3.037 |
|  |  | F@H2.HCO@H3.OH@H4          | 3.031 |
|  |  | CHCH2@H2.OH@H4             | 3.031 |
|  |  | HCO@H2.CCH@H3.OH@H4        | 3.028 |
|  |  | NHMe@H2.Me@H3.F@H5         | 3.026 |
|  |  | CONH2@H2.OH@H3.NH2@H4      | 3.024 |
|  |  | CHNH@H2.Cl@H3.OH@H4        | 3.024 |
|  |  | OEt@H2.OH@H3               | 3.023 |
|  |  | Br@H2.HCO@H3.F@H5          | 3.021 |
|  |  | HCO@H2.NH2@H3.OH@H4.F@H5   | 3.020 |
|  |  | CHNH@H2.OH@H3              | 3.020 |

|          |  |                                      |       |
|----------|--|--------------------------------------|-------|
|          |  | CN@H2.CHNH@H3.OH@H4                  | 3.020 |
|          |  | Et@H2.CCH@H3.OH@H4                   | 3.019 |
|          |  | NO2@H2.Cl@H3.F@H4                    | 3.019 |
|          |  | F@H2.NH2@H3.OH@H4                    | 3.017 |
|          |  | Et@H2.CHNH@H3                        | 3.016 |
|          |  | Cl@H2.CHNH@H3.OH@H4                  | 3.016 |
|          |  | NHMe@H2.OH@H5                        | 3.016 |
|          |  | HCO@H2.NH2@H3.HCO@H4                 | 3.016 |
|          |  | OH@H1.OMe@H5                         | 3.015 |
|          |  | Me@H2.CHNH@H3.OH@H4                  | 3.014 |
|          |  | NO2@H2.Me@H5                         | 3.012 |
|          |  | HCO@H2.OH@H3.HCO@H4                  | 3.011 |
|          |  | Me@H2.Me@H3.NH2@H4                   | 3.010 |
|          |  | HCO@H2.HCO@H3.NH2@H4                 | 3.009 |
|          |  | CHNH@H2.OH@H3.F@H5                   | 3.007 |
|          |  | NH2@H2.HCO@H4.NH2@H5                 | 3.006 |
|          |  | Cl@H2.HCO@H3.OH@H4.F@H5              | 3.006 |
|          |  | NO2@H2.Me@H3.OH@H4.F@H5              | 3.005 |
|          |  | Me@H2.Me@H3.NHMe@H5                  | 3.005 |
|          |  | COOH@H2.OH@H3.F@H5                   | 3.005 |
|          |  | HCO@H3.NH2@H4                        | 3.005 |
|          |  | HCO@H2.OH@H4.OH@H5                   | 3.004 |
|          |  | F@H2.CHNH@H3                         | 3.003 |
|          |  | CHNH@H2.HCO@H3.F@H5                  | 3.002 |
|          |  | COOH@H2.NH2@H3.OH@H4.F@H5            | 3.001 |
|          |  | NH2@H2.NH2@H3.HCO@H4                 | 3.001 |
|          |  | CONH2@H2.NH2@H3.HCO@H4               | 3.001 |
|          |  | NHMe@H2.CHNH@H3                      | 3.001 |
|          |  | Me@H2.HCO@H3.F@H4                    | 3.000 |
| WAFKEU02 |  | NH2@H1.CHCH2@H2.NO2@H4.HCO@H5        | 3.504 |
|          |  | OH@H2.SO3H@H4.Pr@H5.HCO@H6           | 3.497 |
|          |  | NH2@H1.CHCH2@H2.NO2@H4.OMe@H5        | 3.338 |
|          |  | NH2@H1.CHCH2@H2.CONH2@H4.HCO@H5.F@H6 | 3.160 |
|          |  | NHMe@H1.OH@H3.SO3H@H4.CCH@H5.HCO@H6  | 3.102 |
|          |  | CCH@H1.HCO@H2.HCO@H3.HCO@H5.CHCH2@H6 | 3.075 |
|          |  | Me@H1.CHCH2@H2.NO2@H4.HCO@H6         | 3.069 |
|          |  | OMe@H1.OH@H3.SO3H@H4.CCH@H5.HCO@H6   | 3.026 |

|                       |                                                                                    |                       |       |
|-----------------------|------------------------------------------------------------------------------------|-----------------------|-------|
|                       | 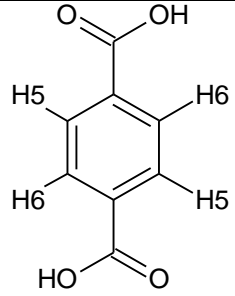  |                       |       |
| WUJFOX                |   | Me@H4                 | 3.005 |
| XACYAB                |  | HCO@H3.CHNH@H5        | 3.607 |
|                       |                                                                                    | NO2@H3.CHNH@H5        | 3.533 |
|                       |                                                                                    | CHNH@H1.NO2@H3.F@H5   | 3.484 |
|                       |                                                                                    | OH@H2.CONH2@H5        | 3.475 |
|                       |                                                                                    | OH@H2.F@H3.CCH@H5     | 3.231 |
|                       |                                                                                    | NO2@H3.NO2@H5         | 3.210 |
|                       |                                                                                    | OEte@H2.CN@H3         | 3.206 |
|                       |                                                                                    | HCO@H3.CCH@H5         | 3.181 |
|                       |                                                                                    | F@H1.OH@H2            | 3.175 |
|                       |                                                                                    | NH2@H1.HCO@H3.CHNH@H5 | 3.174 |
|                       |                                                                                    | HCO@H3.NO2@H5         | 3.123 |
|                       |                                                                                    | NO2@H3.NH2@H5         | 3.122 |
|                       |                                                                                    | OEte@H2.NO2@H5        | 3.118 |
|                       |                                                                                    | OH@H1                 | 3.092 |
| OEte@H2.Cl@H3.HCO@H5  | 3.050                                                                              |                       |       |
| OMe@H2.HCO@H5         | 3.036                                                                              |                       |       |
| NO2@H1.NH2@H3.CHNH@H5 | 3.031                                                                              |                       |       |
| OH@H1.NO2@H3          | 3.009                                                                              |                       |       |

|                           |       |                               |       |
|---------------------------|-------|-------------------------------|-------|
| ZBP                       |       | HCO@H1.HCO@H3.CHCH2@H4        | 4.238 |
|                           |       | NO2@H1.Me@H3.HCO@H4           | 4.213 |
|                           |       | Me@H2.HCO@H3.NO2@H4           | 4.188 |
|                           |       | NO2@H1.HCO@H3.NHMe@H4         | 4.025 |
|                           |       | HCO@H1.CHCH2@H3.HCO@H4        | 4.000 |
|                           |       | Me@H2.HCO@H3.HCO@H4           | 3.961 |
|                           |       | NO2@H1.Me@H4                  | 3.934 |
|                           |       | NO2@H1.NH2@H3.Me@H4           | 3.923 |
|                           |       | NO2@H1.Me@H3.NH2@H4           | 3.921 |
|                           |       | NO2@H1.Me@H3.MeNH2@H4         | 3.918 |
|                           |       | NO2@H1.OH@H3.HCO@H4           | 3.914 |
|                           |       | NO2@H1.HCO@H3.CHCH2@H4        | 3.900 |
|                           |       | Me@H2.CONH2@H3.HCO@H4         | 3.859 |
|                           |       | Me@H2.NO2@H3.NO2@H4           | 3.842 |
|                           |       | NO2@H1.Me@H3.CHNH@H4          | 3.829 |
|                           |       | HCO@H1.NH2@H3.Me@H4           | 3.820 |
|                           |       | NO2@H1.NH2@H3.NHMe@H4         | 3.797 |
|                           |       | NH2@H2.OMe@H3.OMe@H4          | 3.775 |
|                           |       | NO2@H1.HCO@H3.HCO@H4          | 3.718 |
|                           |       | NO2@H1.CN@H3.CHCH2@H4         | 3.710 |
|                           |       | Me@H2.NHMe@H3.HCO@H4          | 3.699 |
|                           |       | NO2@H1.HCO@H3.NH2@H4          | 3.691 |
|                           |       | Me@H2.HCO@H3.CONH2@H4         | 3.675 |
|                           |       | NO2@H1.HCO@H3                 | 3.669 |
|                           |       | NO2@H1.HCO@H3.OMe@H4          | 3.669 |
|                           |       | Pr@H4                         | 3.641 |
|                           |       | CCH@H2.HCO@H3.OMe@H4          | 3.634 |
|                           |       | HCO@H1.HCO@H3.HCO@H4          | 3.633 |
|                           |       | CHCH2@H1.NO2@H3.CHCH2@H4      | 3.619 |
|                           |       | NO2@H1.NHMe@H3.OMe@H4         | 3.618 |
|                           |       | Me@H2.CONH2@H3.NO2@H4         | 3.617 |
|                           |       | NHMe@H1.OH@H2.MeNH2@H3.CN@H4  | 3.609 |
|                           |       | NO2@H1.NH2@H3.CHCH2@H4        | 3.604 |
|                           |       | MeNH2@H1.HCO@H3.Me@H4         | 3.603 |
|                           |       | NO2@H1.CHCH2@H3.CHCH2@H4      | 3.591 |
|                           |       | CHCH2@H1.OH@H2.NO2@H3.COOH@H4 | 3.588 |
|                           |       | HCO@H1.NO2@H3.HCO@H4          | 3.584 |
|                           |       | SO3H@H3.NO2@H4                | 3.582 |
|                           |       | OH@H1.SO3H@H3.HCO@H4          | 3.579 |
|                           |       | NH2@H1.OEte@H2.CN@H3.OH@H4    | 3.576 |
| NH2@H1.OH@H2.Et@H3.HCO@H4 | 3.560 |                               |       |

|  |  |                               |       |
|--|--|-------------------------------|-------|
|  |  | HCO@H1.COOH@H3.HCO@H4         | 3.554 |
|  |  | HCO@H1.Me@H3.HCO@H4           | 3.550 |
|  |  | CHCH2@H1.CHNH@H3.HCO@H4       | 3.549 |
|  |  | NHMe@H1.OH@H2.CCH@H3.Me@H4    | 3.548 |
|  |  | NO2@H1.HCO@H3.MeNH2@H4        | 3.544 |
|  |  | HCO@H1.HCO@H3.CHNH@H4         | 3.544 |
|  |  | NO2@H1.Cl@H3.CHCH2@H4         | 3.539 |
|  |  | HCO@H1.HCO@H3.OMe@H4          | 3.528 |
|  |  | HCO@H3.CHCH2@H4               | 3.519 |
|  |  | NO2@H3.SO3H@H4                | 3.518 |
|  |  | Me@H2.COOH@H3.OMe@H4          | 3.518 |
|  |  | NO2@H1.CCH@H3.OH@H4           | 3.502 |
|  |  | NO2@H1.MeNH2@H3.OH@H4         | 3.500 |
|  |  | CHCH2@H2.SO3H@H3.MeNH2@H4     | 3.499 |
|  |  | HCO@H1.Me@H4                  | 3.495 |
|  |  | CCH@H2.OMe@H3.HCO@H4          | 3.493 |
|  |  | OH@H1.HCO@H3.SO3H@H4          | 3.492 |
|  |  | HCO@H1.NH2@H3.HCO@H4          | 3.491 |
|  |  | NO2@H1.OH@H3.NH2@H4           | 3.491 |
|  |  | NO2@H1.CN@H3                  | 3.484 |
|  |  | NO2@H1.Me@H3.Cl@H4            | 3.478 |
|  |  | HCO@H1.Me@H3.CN@H4            | 3.477 |
|  |  | NO2@H1.OMe@H3.HCO@H4          | 3.477 |
|  |  | NO2@H1.NH2@H3.CHNH@H4         | 3.477 |
|  |  | Me@H2.OMe@H3.OMe@H4           | 3.476 |
|  |  | HCO@H1.CHCH2@H3.NO2@H4        | 3.475 |
|  |  | NHMe@H1.OH@H2.Cl@H3.Cl@H4     | 3.473 |
|  |  | HCO@H1.OH@H3.OMe@H4           | 3.462 |
|  |  | CHCH2@H2.MeNH2@H3.SO3H@H4     | 3.461 |
|  |  | NO2@H1.Cl@H3.OMe@H4           | 3.456 |
|  |  | HCO@H1.CHNH@H3.HCO@H4         | 3.455 |
|  |  | Me@H2.NO2@H3.CHCH2@H4         | 3.436 |
|  |  | CHCH2@H2.SO3H@H3.OH@H4        | 3.436 |
|  |  | NHMe@H1.OH@H2.Me@H3.Cl@H4     | 3.431 |
|  |  | NO2@H1.HCO@H3.OH@H4           | 3.430 |
|  |  | OMe@H1.HCO@H3.HCO@H4          | 3.428 |
|  |  | HCO@H1.Me@H3.Cl@H4            | 3.427 |
|  |  | HCO@H1.OH@H3.HCO@H4           | 3.411 |
|  |  | NH2@H2.COOH@H3.OMe@H4         | 3.411 |
|  |  | CHCH2@H3.HCO@H4               | 3.409 |
|  |  | HCO@H1.OMe@H2.CONH2@H3.HCO@H4 | 3.409 |

|  |  |                               |       |
|--|--|-------------------------------|-------|
|  |  | HCO@H1.Et@H3.HCO@H4           | 3.408 |
|  |  | OMe@H1.CHNH@H3.CHNH@H4        | 3.407 |
|  |  | CHCH2@H2.NH2@H3.SO3H@H4       | 3.397 |
|  |  | CHCH2@H2.SO3H@H3.CHCH2@H4     | 3.396 |
|  |  | NO2@H1.F@H3.Me@H4             | 3.394 |
|  |  | NO2@H1.NH2@H2.CONH2@H3.NH2@H4 | 3.393 |
|  |  | NO2@H1.Me@H2.NHMe@H3.Cl@H4    | 3.388 |
|  |  | NO2@H1.NH2@H2.CONH2@H3.Me@H4  | 3.385 |
|  |  | CHCH2@H2.SO3H@H3.NH2@H4       | 3.379 |
|  |  | HCO@H1.Pr@H3.F@H4             | 3.376 |
|  |  | OH@H2.OEt@H3.OMe@H4           | 3.372 |
|  |  | NO2@H1.CCH@H3.CHNH@H4         | 3.363 |
|  |  | NO2@H1.CCH@H2.HCO@H3          | 3.356 |
|  |  | NO2@H1.CHCH2@H3.Me@H4         | 3.353 |
|  |  | MeNH2@H1.CHNH@H3.Me@H4        | 3.350 |
|  |  | NO2@H1.NH2@H2.Me@H3.CONH2@H4  | 3.349 |
|  |  | NO2@H1.F@H3.CHCH2@H4          | 3.345 |
|  |  | MeNH2@H1.OH@H2.Cl@H3.Me@H4    | 3.344 |
|  |  | HCO@H3.SO3H@H4                | 3.339 |
|  |  | NO2@H1.NH2@H2.Et@H3.Me@H4     | 3.338 |
|  |  | HCO@H1.CHNH@H3.CHNH@H4        | 3.334 |
|  |  | Me@H2.NO2@H3.Cl@H4            | 3.331 |
|  |  | CHCH2@H2.OH@H3.SO3H@H4        | 3.328 |
|  |  | NO2@H1.Me@H3.CN@H4            | 3.327 |
|  |  | HCO@H1.MeNH2@H3.HCO@H4        | 3.325 |
|  |  | OH@H2.OMe@H3.OEt@H4           | 3.323 |
|  |  | NO2@H1.OMe@H3.CHCH2@H4        | 3.322 |
|  |  | NHMe@H2.SO3H@H4               | 3.321 |
|  |  | CHCH2@H1.CHNH@H3.NO2@H4       | 3.319 |
|  |  | Me@H2.NH2@H3.NO2@H4           | 3.318 |
|  |  | SO3H@H3.HCO@H4                | 3.317 |
|  |  | MeNH2@H1.NHMe@H3.HCO@H4       | 3.316 |
|  |  | CHCH2@H1.SO3H@H3.SO3H@H4      | 3.314 |
|  |  | NO2@H1.CHCH2@H3.HCO@H4        | 3.309 |
|  |  | HCO@H1.OH@H2.NHMe@H3.HCO@H4   | 3.304 |
|  |  | HCO@H1.CHNH@H3.Cl@H4          | 3.297 |
|  |  | NO2@H1.CCH@H3.NH2@H4          | 3.297 |
|  |  | MeNH2@H1.OH@H2.Et@H3.OH@H4    | 3.294 |
|  |  | OMe@H1.OH@H2.CHNH@H3.CHNH@H4  | 3.294 |
|  |  | HCO@H1.OEt@H3.OH@H4           | 3.291 |
|  |  | CHCH2@H1.COOH@H2.HCO@H4       | 3.284 |



|  |  |                                 |       |
|--|--|---------------------------------|-------|
|  |  | NO2@H1.CHCH2@H3.NH2@H4          | 3.282 |
|  |  | NHMe@H1.OH@H2.Et@H3.NH2@H4      | 3.281 |
|  |  | NO2@H1.Et@H3.CHCH2@H4           | 3.280 |
|  |  | SO3H@H3.COOH@H4                 | 3.277 |
|  |  | HCO@H1.CN@H3.HCO@H4             | 3.276 |
|  |  | NO2@H1.CHCH2@H3.OH@H4           | 3.276 |
|  |  | OMe@H1.OH@H2.HCO@H3.CHNH@H4     | 3.275 |
|  |  | Me@H2.HCO@H3.CHNH@H4            | 3.274 |
|  |  | OMe@H1.HCO@H3.COOH@H4           | 3.273 |
|  |  | HCO@H1.OH@H2.Et@H3.HCO@H4       | 3.271 |
|  |  | NO2@H1.CCH@H3                   | 3.270 |
|  |  | HCO@H1.Me@H3.NHMe@H4            | 3.268 |
|  |  | NH2@H1.OEt@H2.CN@H3.Cl@H4       | 3.266 |
|  |  | MeNH2@H1.OH@H2.CONH2@H3.CHNH@H4 | 3.262 |
|  |  | HCO@H3.Et@H4                    | 3.261 |
|  |  | HCO@H1.F@H3.Me@H4               | 3.261 |
|  |  | OH@H1.OEt@H2.HCO@H4             | 3.258 |
|  |  | NH2@H1.OH@H2.CN@H3.Et@H4        | 3.254 |
|  |  | NO2@H1.OH@H3.CHNH@H4            | 3.251 |
|  |  | NO2@H2.NO2@H3.CHCH2@H4          | 3.251 |
|  |  | CHCH2@H2.SO3H@H3.NHMe@H4        | 3.250 |
|  |  | NHMe@H2.HCO@H3.HCO@H4           | 3.246 |
|  |  | CHCH2@H1.HCO@H3.CHNH@H4         | 3.246 |
|  |  | NO2@H1.NH2@H2.NHMe@H3.Me@H4     | 3.242 |
|  |  | MeNH2@H1.CN@H2.CHNH@H3.CHNH@H4  | 3.239 |
|  |  | HCO@H1.NH2@H3.CHNH@H4           | 3.232 |
|  |  | HCO@H1.NO2@H3.NHMe@H4           | 3.230 |
|  |  | MeNH2@H1.OH@H2.Me@H3.HCO@H4     | 3.229 |
|  |  | OH@H1.OMe@H3.NO2@H4             | 3.225 |
|  |  | CHCH2@H2.NO2@H3.SO3H@H4         | 3.223 |
|  |  | NH2@H1.Et@H3.HCO@H4             | 3.223 |
|  |  | CHCH2@H2.CHCH2@H3.SO3H@H4       | 3.218 |
|  |  | HCO@H1.OH@H2.COOH@H3.COOH@H4    | 3.217 |
|  |  | HCO@H1.Cl@H3.HCO@H4             | 3.215 |
|  |  | NO2@H1.CN@H3.Me@H4              | 3.213 |
|  |  | NH2@H2.HCO@H3.HCO@H4            | 3.213 |
|  |  | HCO@H1.OH@H2.OMe@H3             | 3.212 |
|  |  | NO2@H1.CCH@H3.Me@H4             | 3.209 |
|  |  | NO2@H1.Me@H3.CCH@H4             | 3.209 |
|  |  | NHMe@H2.Et@H3.HCO@H4            | 3.207 |
|  |  | HCO@H1.CHNH@H3.NH2@H4           | 3.206 |

|  |                                  |       |
|--|----------------------------------|-------|
|  | HCO@H1.CCH@H2.HCO@H3.NH2@H4      | 3.206 |
|  | HCO@H1.HCO@H3.NO2@H4             | 3.205 |
|  | CHCH2@H1.OH@H2.CHNH@H3.CHCH2@H4  | 3.202 |
|  | CHCH2@H2.SO3H@H3.Cl@H4           | 3.202 |
|  | HCO@H1.Et@H3.CHNH@H4             | 3.197 |
|  | NO2@H1.CCH@H3.F@H4               | 3.197 |
|  | MeNH2@H1.HCO@H3.CHCH2@H4         | 3.197 |
|  | NO2@H1.Me@H3.Me@H4               | 3.196 |
|  | NO2@H1.CHCH2@H3.NHMe@H4          | 3.193 |
|  | CHCH2@H1.NO2@H4                  | 3.192 |
|  | HCO@H1.HCO@H3.NH2@H4             | 3.188 |
|  | Me@H2.NH2@H3.HCO@H4              | 3.182 |
|  | MeNH2@H1.OH@H2.COOH@H3.CHNH@H4   | 3.181 |
|  | NO2@H1.OEt@H4                    | 3.180 |
|  | NO2@H1.CN@H3.F@H4                | 3.179 |
|  | SO3H@H3.CN@H4                    | 3.179 |
|  | NHMe@H1.OH@H2.Et@H3.CN@H4        | 3.177 |
|  | OEt@H2.Pr@H4                     | 3.176 |
|  | NO2@H1.Me@H2.OMe@H3.Cl@H4        | 3.176 |
|  | NO2@H1.OH@H2.Me@H3.Me@H4         | 3.174 |
|  | NH2@H2.NO2@H3.HCO@H4             | 3.174 |
|  | MeNH2@H1.OH@H2.Me@H3.Cl@H4       | 3.174 |
|  | HCO@H1.CCH@H2.HCO@H3.HCO@H4      | 3.173 |
|  | MeNH2@H1.NH2@H2.CONH2@H3.CHNH@H4 | 3.170 |
|  | CHCH2@H2.HCO@H3.HCO@H4           | 3.169 |
|  | OMe@H1.NO2@H3.CHNH@H4            | 3.168 |
|  | NO2@H1.HCO@H3.Cl@H4              | 3.168 |
|  | NO2@H2.NH2@H3.CHNH@H4            | 3.164 |
|  | CHCH2@H1.OH@H2.HCO@H3.CHNH@H4    | 3.163 |
|  | MeNH2@H1.NH2@H2.CHNH@H3.CHNH@H4  | 3.159 |
|  | NHMe@H2.COOH@H3.Et@H4            | 3.154 |
|  | HCO@H1.OH@H2.CCH@H3              | 3.153 |
|  | MeNH2@H1.Me@H3.CHCH2@H4          | 3.152 |
|  | NO2@H1.OH@H3.OH@H4               | 3.150 |
|  | OMe@H1.NHMe@H3.HCO@H4            | 3.150 |
|  | OH@H1.HCO@H3.CHCH2@H4            | 3.148 |
|  | Me@H2.NO2@H3.OMe@H4              | 3.147 |
|  | Me@H2.OH@H3.HCO@H4               | 3.146 |
|  | MeNH2@H1.OH@H2.HCO@H3.CN@H4      | 3.145 |
|  | CHCH2@H2.NO2@H3.MeNH2@H4         | 3.143 |
|  | HCO@H1.OMe@H3.HCO@H4             | 3.142 |

|  |  |                                |       |
|--|--|--------------------------------|-------|
|  |  | NH2@H2.CONH2@H3.NO2@H4         | 3.141 |
|  |  | CHCH2@H2.NHMe@H3.SO3H@H4       | 3.141 |
|  |  | Me@H2.CONH2@H3.COOH@H4         | 3.140 |
|  |  | Me@H3.HCO@H4                   | 3.139 |
|  |  | HCO@H1.HCO@H3.NHMe@H4          | 3.138 |
|  |  | NO2@H2.NH2@H3.CONH2@H4         | 3.137 |
|  |  | HCO@H1.SO3H@H3.F@H4            | 3.135 |
|  |  | NO2@H1.CN@H3.NH2@H4            | 3.131 |
|  |  | NO2@H2.CONH2@H3.NH2@H4         | 3.131 |
|  |  | NO2@H1.OH@H2.SO3H@H3.Me@H4     | 3.130 |
|  |  | CHCH2@H1.OH@H2.HCO@H3.CCH@H4   | 3.127 |
|  |  | MeNH2@H1.NH2@H2.HCO@H3.CHNH@H4 | 3.126 |
|  |  | NHMe@H1.OH@H2.MeNH2@H3.Cl@H4   | 3.125 |
|  |  | NO2@H1.Me@H3.Br@H4             | 3.124 |
|  |  | NO2@H1.OH@H4                   | 3.123 |
|  |  | Me@H2.OMe@H3.NO2@H4            | 3.123 |
|  |  | OH@H2.SO3H@H3.CCH@H4           | 3.122 |
|  |  | HCO@H1.CN@H3.OMe@H4            | 3.120 |
|  |  | HCO@H1.Cl@H3.Me@H4             | 3.118 |
|  |  | NH2@H2.OMe@H3.OPr@H4           | 3.112 |
|  |  | NO2@H1.NH2@H2.CHNH@H3.CHCH2@H4 | 3.111 |
|  |  | NO2@H1.COOH@H3                 | 3.109 |
|  |  | NHMe@H1.OH@H2.Et@H3.Cl@H4      | 3.109 |
|  |  | NHMe@H1.HCO@H3.NHMe@H4         | 3.109 |
|  |  | NH2@H2.OMe@H3.COOH@H4          | 3.104 |
|  |  | OMe@H1.CHNH@H3.Et@H4           | 3.104 |
|  |  | NH2@H1.OEt@H2.COOH@H3.F@H4     | 3.104 |
|  |  | NO2@H1.SO3H@H3.HCO@H4          | 3.104 |
|  |  | NO2@H2.HCO@H3.CHCH2@H4         | 3.104 |
|  |  | HCO@H1.CCH@H3.OMe@H4           | 3.101 |
|  |  | HCO@H1.F@H2.CHCH2@H3.COOH@H4   | 3.100 |
|  |  | HCO@H1.CCH@H2.NHMe@H3          | 3.100 |
|  |  | CHCH2@H2.SO3H@H4               | 3.098 |
|  |  | OMe@H1.CN@H2.CHNH@H3.HCO@H4    | 3.097 |
|  |  | HCO@H1.Et@H3.CHCH2@H4          | 3.097 |
|  |  | HCO@H1.Br@H3.Me@H4             | 3.095 |
|  |  | CHCH2@H2.SO3H@H3.OEt@H4        | 3.095 |
|  |  | F@H1.Me@H2.HCO@H3.HCO@H4       | 3.095 |
|  |  | NO2@H1.MeNH2@H3.HCO@H4         | 3.094 |
|  |  | CHCH2@H2.SO3H@H3               | 3.093 |
|  |  | NO2@H3.HCO@H4                  | 3.093 |

|  |  |                                |       |
|--|--|--------------------------------|-------|
|  |  | NO2@H1.NHMe@H4                 | 3.092 |
|  |  | NO2@H2.NO2@H3.NH2@H4           | 3.091 |
|  |  | Me@H2.CHNH@H3.COOH@H4          | 3.091 |
|  |  | CHCH2@H2.OMe@H3.SO3H@H4        | 3.090 |
|  |  | Me@H2.COOH@H3.CONH2@H4         | 3.089 |
|  |  | NH2@H1.CN@H2.OMe@H3.HCO@H4     | 3.089 |
|  |  | NO2@H2.HCO@H3.HCO@H4           | 3.087 |
|  |  | NHMe@H1.SO3H@H3.NHMe@H4        | 3.087 |
|  |  | MeNH2@H1.HCO@H3.CHNH@H4        | 3.086 |
|  |  | NO2@H1.CCH@H3.CHCH2@H4         | 3.086 |
|  |  | OPre@H3.OMe@H4                 | 3.084 |
|  |  | Me@H2.NO2@H3.NH2@H4            | 3.081 |
|  |  | NO2@H1.F@H3.NH2@H4             | 3.079 |
|  |  | HCO@H1.CCH@H3.HCO@H4           | 3.078 |
|  |  | NO2@H1.COOH@H3.CHCH2@H4        | 3.078 |
|  |  | NO2@H1.OMe@H3.OH@H4            | 3.078 |
|  |  | NHMe@H1.HCO@H3.CHNH@H4         | 3.077 |
|  |  | NO2@H1.Me@H3.OEt@H4            | 3.077 |
|  |  | NO2@H1.NH2@H3.OEt@H4           | 3.077 |
|  |  | NH2@H1.OMe@H2.CHCH2@H3.SO3H@H4 | 3.075 |
|  |  | OMe@H1.NO2@H3.COOH@H4          | 3.074 |
|  |  | NH2@H1.OEt@H2.CONH2@H3.COOH@H4 | 3.074 |
|  |  | NHMe@H1.OH@H2.NO2@H3.HCO@H4    | 3.074 |
|  |  | MeNH2@H1.NH2@H2.Cl@H3.CHNH@H4  | 3.073 |
|  |  | NO2@H1.NH2@H3.OH@H4            | 3.072 |
|  |  | HCO@H1.HCO@H3.SO3H@H4          | 3.071 |
|  |  | CHCH2@H1.OH@H2.HCO@H3.CHCH2@H4 | 3.071 |
|  |  | MeNH2@H1.OH@H2.NO2@H3.CHNH@H4  | 3.069 |
|  |  | CHCH2@H1.NO2@H2.NH2@H4         | 3.067 |
|  |  | OMe@H1.CN@H2.NH2@H3.HCO@H4     | 3.067 |
|  |  | Me@H2.HCO@H3.NH2@H4            | 3.066 |
|  |  | CHCH2@H1.CHNH@H3.COOH@H4       | 3.065 |
|  |  | CCH@H2.OMe@H3.NO2@H4           | 3.064 |
|  |  | Me@H2.NO2@H3.NHMe@H4           | 3.064 |
|  |  | NH2@H1.OMe@H2.COOH@H3.NO2@H4   | 3.062 |
|  |  | NO2@H1.NHMe@H3.NHMe@H4         | 3.061 |
|  |  | OH@H2.CCH@H3.SO3H@H4           | 3.059 |
|  |  | NO2@H1.COOH@H3.NHMe@H4         | 3.058 |
|  |  | NHMe@H1.OH@H2.CN@H3.HCO@H4     | 3.057 |
|  |  | NO2@H1.Br@H3.OH@H4             | 3.057 |
|  |  | NH2@H2.OMe@H3.Et@H4            | 3.055 |

|  |  |                                  |       |
|--|--|----------------------------------|-------|
|  |  | HCO@H1.Me@H3.CHNH@H4             | 3.054 |
|  |  | OMe@H1.HCO@H3.CHCH2@H4           | 3.054 |
|  |  | CN@H2.NO2@H3.CONH2@H4            | 3.051 |
|  |  | OH@H1.OEt@H2.Me@H4               | 3.050 |
|  |  | NHMe@H1.OH@H2.CHCH2@H3.CONH2@H4  | 3.050 |
|  |  | NO2@H2.CHNH@H3.NH2@H4            | 3.049 |
|  |  | CN@H2.HCO@H3.OMe@H4              | 3.049 |
|  |  | OMe@H1.HCO@H3.SO3H@H4            | 3.049 |
|  |  | NH2@H2.OMe@H3.HCO@H4             | 3.049 |
|  |  | Cl@H2.SO3H@H3.HCO@H4             | 3.049 |
|  |  | NH2@H2.Et@H3.OMe@H4              | 3.047 |
|  |  | OMe@H1.NO2@H3.CONH2@H4           | 3.045 |
|  |  | NH2@H2.CONH2@H3.OMe@H4           | 3.045 |
|  |  | MeNH2@H1.CCH@H2.CHNH@H3.NH2@H4   | 3.043 |
|  |  | MeNH2@H1.HCO@H3.HCO@H4           | 3.042 |
|  |  | HCO@H1.F@H2.Cl@H3.OH@H4          | 3.042 |
|  |  | CCH@H2.HCO@H3.HCO@H4             | 3.040 |
|  |  | HCO@H3.NHMe@H4                   | 3.039 |
|  |  | NO2@H1.Cl@H3.Me@H4               | 3.039 |
|  |  | NH2@H1.NHMe@H2.COOH@H3.CONH2@H4  | 3.037 |
|  |  | CHCH2@H2.CONH2@H3.SO3H@H4        | 3.035 |
|  |  | HCO@H1.F@H2.F@H3.COOH@H4         | 3.035 |
|  |  | CHCH2@H2.NO2@H3.OMe@H4           | 3.034 |
|  |  | CHCH2@H2.SO3H@H3.OMe@H4          | 3.033 |
|  |  | CHCH2@H1.SO3H@H3.MeNH2@H4        | 3.033 |
|  |  | HCO@H1.NO2@H3.OMe@H4             | 3.033 |
|  |  | MeNH2@H1.NHMe@H3.NO2@H4          | 3.031 |
|  |  | NHMe@H1.SO3H@H3.SO3H@H4          | 3.030 |
|  |  | NO2@H1.NO2@H3.Me@H4              | 3.029 |
|  |  | OMe@H1.NO2@H3.HCO@H4             | 3.026 |
|  |  | NH2@H1.CHCH2@H2.CHCH2@H3.SO3H@H4 | 3.026 |
|  |  | NO2@H1.OMe@H4                    | 3.025 |
|  |  | MeNH2@H1.OH@H2.Me@H3.NH2@H4      | 3.025 |
|  |  | HCO@H1.CN@H2.CONH2@H3.HCO@H4     | 3.023 |
|  |  | MeNH2@H1.F@H2.CHNH@H3.CN@H4      | 3.023 |
|  |  | NHMe@H1.NH2@H2.NO2@H3.HCO@H4     | 3.022 |
|  |  | HCO@H1.CONH2@H3.SO3H@H4          | 3.021 |
|  |  | HCO@H1.CN@H3.CHCH2@H4            | 3.021 |
|  |  | HCO@H1.F@H2.CONH2@H3.HCO@H4      | 3.019 |
|  |  | NO2@H1.CN@H3.HCO@H4              | 3.018 |
|  |  | NO2@H1.F@H3.CHNH@H4              | 3.017 |

|  |  |                                  |       |
|--|--|----------------------------------|-------|
|  |  | HCO@H1.OH@H3.CHNH@H4             | 3.017 |
|  |  | OH@H2.Et@H3.Me@H4                | 3.016 |
|  |  | CHCH2@H1.OH@H2.CN@H3.HCO@H4      | 3.015 |
|  |  | NO2@H1.Me@H2.CHCH2@H3.Cl@H4      | 3.015 |
|  |  | NO2@H1.HCO@H3.CCH@H4             | 3.014 |
|  |  | Me@H2.NO2@H3.HCO@H4              | 3.012 |
|  |  | NH2@H1.CHCH2@H2.SO3H@H3.CHCH2@H4 | 3.012 |
|  |  | NH2@H2.NO2@H3.COOH@H4            | 3.012 |
|  |  | OH@H1.NH2@H3.SO3H@H4             | 3.010 |
|  |  | CHCH2@H1.OH@H2.Me@H3.MeNH2@H4    | 3.008 |
|  |  | NO2@H2.OH@H3.CONH2@H4            | 3.007 |
|  |  | CHCH2@H1.Et@H3.HCO@H4            | 3.005 |
|  |  | CONH2@H3.HCO@H4                  | 3.005 |
|  |  | HCO@H1.CHNH@H3.CCH@H4            | 3.005 |
|  |  | NO2@H1.HCO@H4                    | 3.005 |
|  |  | Me@H2.NO2@H3                     | 3.004 |
|  |  | HCO@H1.OMe@H3.NO2@H4             | 3.004 |
|  |  | OMe@H1.NH2@H3.HCO@H4             | 3.003 |
|  |  | CHCH2@H1.NO2@H3.NHMe@H4          | 3.003 |
|  |  | NO2@H1.CCH@H3.HCO@H4             | 3.002 |
|  |  | NH2@H1.CCH@H2.NO2@H3.CONH2@H4    | 3.002 |
|  |  | OPre@H2.OH@H3                    | 3.001 |
|  |  | CHCH2@H1.CONH2@H3.HCO@H4         | 3.000 |

**table S9. Details of functional group codes and their associated structure.**

| Functional Group Code | Name             | Structure                                                                                | Functional Group Code | Name                | Structure                                                                                  |
|-----------------------|------------------|------------------------------------------------------------------------------------------|-----------------------|---------------------|--------------------------------------------------------------------------------------------|
| Br                    | Bromide          | X—Br                                                                                     | CCH                   | Ethyne              | X—      |
| CF <sub>3</sub>       | Trifluoromethyl  |         | CHCH <sub>2</sub>     | Ethene              | X—      |
| CHNH                  | Primary Aldimine | X—      | Cl                    | Chloride            | X—Cl                                                                                       |
| CN                    | Cyano            | X—      | CONH <sub>2</sub>     | Acetamide           |         |
| COOH                  | Carboxylic Acid  |         | Et                    | Ethyl               | X—      |
| F                     | Fluoride         | X—F                                                                                      | H                     | -                   | X—H                                                                                        |
| HCO                   | Aldehyde         |       | I                     | Iodide              | X—I                                                                                        |
| Me                    | Methyl           | X—                                                                                       | MeNH <sub>2</sub>     | Pendent-Methylamine | X—    |
| NH <sub>2</sub>       | Amine            | X—NH <sub>2</sub>                                                                        | NHMe                  | Methylamine         | X—    |
| NO <sub>2</sub>       | Nitro            |       | OEt                   | Ethoxy              | X—    |
| OEt                   | Ethene Ether     | X—O—  | OH                    | Hydroxyl            | X—O—H                                                                                      |
| OMe                   | Methoxy          | X—O—                                                                                     | OPr                   | Propoxy             | X—O—  |
| OPre                  | Propene Ether    | X—O—  | Ph                    | Phenyl              | X—    |

|    |        |                                                                                   |                   |               |                                                                                     |
|----|--------|-----------------------------------------------------------------------------------|-------------------|---------------|-------------------------------------------------------------------------------------|
| Pr | Propyl | 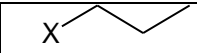 | SO <sub>3</sub> H | Sulfonic Acid |  |
|----|--------|-----------------------------------------------------------------------------------|-------------------|---------------|-------------------------------------------------------------------------------------|
